# Supplementary material for: GPs’ views on the implementation of combined lifestyle interventions in primary care in the Netherlands: a qualitative study
Source: PubMed Central journal article supplement — BMJ Open. 2022 Feb 4;12(2):e056451. doi: 10.1136/bmjopen-2021-056451 (PMC8819797; doi:10.1136/bmjopen-2021-056451), 2022-02-04
Supplement: bmjopen-2021-056451.draft_revisions.pdf [file bmjopen-2021-056451.draft_revisions.pdf]

# BMJ Open

BMJ Open is committed to open peer review. As part of this commitment we make the peer review history of every article we publish publicly available.

When an article is published we post the peer reviewers' comments and the authors' responses online. We also post the versions of the paper that were used during peer review. These are the versions that the peer review comments apply to.

The versions of the paper that follow are the versions that were submitted during the peer review process. They are not the versions of record or the final published versions. They should not be cited or distributed as the published version of this manuscript.

BMJ Open is an open access journal and the full, final, typeset and author-corrected version of record of the manuscript is available on our site with no access controls, subscription charges or pay-per-view fees (<http://bmjopen.bmj.com>).

If you have any questions on BMJ Open's open peer review process please email [info.bmjopen@bmj.com](mailto:info.bmjopen@bmj.com)

# BMJ Open

## **GPs' views on the implementation of combined lifestyle interventions in primary care: a qualitative study.**

|                               |                                                                                                                                                                                                                                                                                                                                                                                                                                                                                                                                                                              |
|-------------------------------|------------------------------------------------------------------------------------------------------------------------------------------------------------------------------------------------------------------------------------------------------------------------------------------------------------------------------------------------------------------------------------------------------------------------------------------------------------------------------------------------------------------------------------------------------------------------------|
| Journal:                      | <i>BMJ Open</i>                                                                                                                                                                                                                                                                                                                                                                                                                                                                                                                                                              |
| Manuscript ID                 | bmjopen-2021-056451                                                                                                                                                                                                                                                                                                                                                                                                                                                                                                                                                          |
| Article Type:                 | Original research                                                                                                                                                                                                                                                                                                                                                                                                                                                                                                                                                            |
| Date Submitted by the Author: | 01-Sep-2021                                                                                                                                                                                                                                                                                                                                                                                                                                                                                                                                                                  |
| Complete List of Authors:     | van der Heiden, W.; Amsterdam Public Health Research Institute, Department of Public & Occupational Health; Philips Research, Department of Digital Engagement, Cognition and Behavior<br>Lacroix, J.P.W.; Philips Research, Department of Digital Engagement, Cognition and Behavior<br>Moll van Charante, Eric P; Amsterdam UMC Locatie AMC, Department of General Practice; Amsterdam Public Health Research Institute, Department of Public & Occupational Health<br>Beune, Erik; Amsterdam Public Health Research Institute, Department of Public & Occupational Health |
| Keywords:                     | PRIMARY CARE, PREVENTIVE MEDICINE, PUBLIC HEALTH, QUALITATIVE RESEARCH                                                                                                                                                                                                                                                                                                                                                                                                                                                                                                       |
|                               |                                                                                                                                                                                                                                                                                                                                                                                                                                                                                                                                                                              |

SCHOLARONE™  
Manuscripts

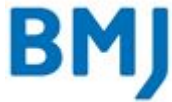

I, the Submitting Author has the right to grant and does grant on behalf of all authors of the Work (as defined in the below author licence), an exclusive licence and/or a non-exclusive licence for contributions from authors who are: i) UK Crown employees; ii) where BMJ has agreed a CC-BY licence shall apply, and/or iii) in accordance with the terms applicable for US Federal Government officers or employees acting as part of their official duties; on a worldwide, perpetual, irrevocable, royalty-free basis to BMJ Publishing Group Ltd ("BMJ") its licensees and where the relevant Journal is co-owned by BMJ to the co-owners of the Journal, to publish the Work in this journal and any other BMJ products and to exploit all rights, as set out in our [licence](#).

The Submitting Author accepts and understands that any supply made under these terms is made by BMJ to the Submitting Author unless you are acting as an employee on behalf of your employer or a postgraduate student of an affiliated institution which is paying any applicable article publishing charge ("APC") for Open Access articles. Where the Submitting Author wishes to make the Work available on an Open Access basis (and intends to pay the relevant APC), the terms of reuse of such Open Access shall be governed by a Creative Commons licence – details of these licences and which [Creative Commons](#) licence will apply to this Work are set out in our licence referred to above.

Other than as permitted in any relevant BMJ Author's Self Archiving Policies, I confirm this Work has not been accepted for publication elsewhere, is not being considered for publication elsewhere and does not duplicate material already published. I confirm all authors consent to publication of this Work and authorise the granting of this licence.

# GPs' views on the implementation of combined lifestyle interventions in primary care: a qualitative study.

W. van der Heiden<sup>1,2</sup>, J.P.W. Lacroix<sup>2</sup>, E.P. Moll van Charante<sup>1,3</sup>, E.J.A.J. Beune<sup>1</sup>

<sup>1</sup> Department of Public & Occupational Health, Amsterdam UMC, University of Amsterdam, Amsterdam, Amsterdam Public Health Research Institute, Amsterdam, the Netherlands.

<sup>2</sup> Department of Digital Engagement, Cognition and Behavior, Philips Research, Eindhoven, the Netherlands.

<sup>3</sup> Department of General Practice, Amsterdam UMC, University of Amsterdam, Amsterdam, the Netherlands.

## For correspondence:

E.J.A.J. Beune

Department of Public & Occupational Health

Amsterdam UMC, University of Amsterdam

Meibergdreef 9

1105 AZ Amsterdam

The Netherlands

Tel: +31650063324

E-mail: [e.j.beune@amsterdamumc.nl](mailto:e.j.beune@amsterdamumc.nl)

## Word count:

3037 words

## Abstract

### Objectives

Prevention and lifestyle support is an emerging topic in general practice. Healthcare insurance companies reimburse combined lifestyle interventions (CLIs) in the Netherlands since January 2019. CLIs support people with overweight or obesity to reduce weight in peer groups, supervised by lifestyle coaches. General practitioners (GPs) are key in the successful implementation of new lifestyle interventions in primary care. Therefore, this study explored GPs' experiences and views on their role in lifestyle support and on implementing CLIs in primary care.

### Design

Qualitative study using semi-structured interviews among a purposive sample of fifteen GPs. Content analysis consisted of coding and mapping a first stage of predefined- and second stage of iterative evolving set of themes, representing GPs' experiences and views.

### Outcomes

Experiences with lifestyle support among GPs ranged from primarily referring patients to other healthcare professionals to taking a proactive role in lifestyle support themselves. Whether or not GPs took an active role in lifestyle support was related to the perceived efficacy of lifestyle interventions. Overall, GPs had little experience with coaches offering CLI in every day practice. Perceived barriers were a lack of visibility and availability of organised CLIs in the region and the potential lack of added value of CLIs on top of existing, reimbursed lifestyle support. Perceived facilitators were coordination of care provision by GP cooperatives and monitoring the CLI implementation and their results. The reimbursement of CLIs without any costs for participants enabled application.

### Conclusion

GPs acknowledge the importance of lifestyle support in primary care, but substantially differ in its provision, and have limited awareness of- and experience with CLIs. Successful integration of CLIs with primary care requires a solid promotion and reimbursement policy, a well-coordinated implementation strategy and structural evaluation of long-term effectiveness.

### Article summary (strengths and limitations)

- Qualitative analysis of the first experiences and expectations of healthcare interventions at an early stage can provide valuable information on barriers and facilitators to implementation.
- This is the first study to explore to what extent a new policy regarding the combined lifestyle intervention (CLI) in the Netherlands was being leveraged. The study interviewed general practitioners (GPs) among a purposive sample guided by a

1  
2  
3 framework, which has been proven useful in the implementation of innovations in  
4 healthcare.

- 5 • Interviews took place in a relatively early phase after the reimbursement policy started,  
6 potentially leading to underestimations of its potential developing yield among GPs.
- 7 • Only GPs were interviewed and the study results may therefore not be generalisable  
8 to perspectives of other health care workers or patients.  
9  
10  
11  
12

### 13 **Keywords**

14 Implementation, healthcare, primary care, lifestyle support, combined lifestyle intervention,  
15 general practitioner  
16  
17  
18  
19  
20  
21

## 22 **Introduction**

23  
24 Implementation of innovations in healthcare is often challenging (1). Implementation  
25 researchers have reported several factors that may positively or negatively influence  
26 implementation of innovations in healthcare. These factors can be divided into a number of  
27 domains: characteristics of the innovation itself, the organisation, the socio-political context,  
28 the available resources and the adopting individual (2–4). Moreover, successful  
29 implementation largely depends on the commitment and support of involved healthcare  
30 professionals (5,6). More insight into factors influencing the process of implementation can be  
31 achieved by studying specific implementation cases (7).  
32  
33  
34

35 Since January 2019, healthcare insurances in de Netherlands have started to reimburse  
36 combined lifestyle interventions (CLIs) for people with overweight or obesity. CLIs are  
37 multicomponent interventions, which consists of interactive sessions with care professionals  
38 (e.g. a lifestyle coach, practice nurse or a paramedic). The 2-year programme is tailored to the  
39 personal needs of the participants and includes group sessions to educate participants on  
40 certain topics, share experiences and provide support (8–10). Participants receive coaching on  
41 physical activity and healthy nutrition. While in the first year, much emphasis is on guided  
42 activities, including exercise, education and sharing experiences, the second year focusses  
43 more on self-management. Lifestyle coaches, trained at a certified educational institute, are  
44 accredited to deliver CLIs to patients referred by GPs.  
45  
46  
47  
48

49 General practitioners (GPs) are increasingly confronted with people with unhealthy weight in  
50 their daily practice, with approximately a quarter of the world population being overweight  
51 and one third of them being obese (11). Unhealthy weight is a major driver for chronic  
52 conditions such as diabetes and cardiovascular diseases (12), and contributes to poor quality  
53 of life and increased healthcare costs (13). Therefore, there is a growing urgency to address  
54 overweight or obesity by offering healthy lifestyle support in primary health care (14). In  
55 particular, multicomponent lifestyle interventions appear to be promising in effectively  
56 reducing overweight and obesity (15–21). Due to the new reimbursement policy for CLIs, all  
57  
58  
59  
60

Dutch citizens with overweight or obesity became formally eligible for refunded participation in a CLI per January 2019.

One important but often overlooked question is whether healthcare innovations can be successfully implemented and scaled up in practice. This study explored the perceptions, intentions and behaviours on lifestyle support in general and the introduction of the CLIs in particular. Barriers and facilitators at an early stage of implementation were identified. This knowledge may contribute to optimising implementation of CLIs and/or similar healthcare innovations into primary care.

## Method

### Study design

This qualitative study consisted of semi-structured interviews among a purposive sample of 15 GPs, guided by a topic list. The technology acceptance model (TAM) (22) was used as inspiration and framework for relevant topics for the interview guide (table 1) and coding of the transcripts. The TAM model was chosen as this was originally developed as a framework for the introduction and implementation of innovative interventions (23,24). Several TAM variations have been developed since the introduction of the original TAM, which have been proven useful in different research domains, including implementation research in healthcare (25).

**Table 1.** Interview topic guide

| Topics                   |                                                                              |
|--------------------------|------------------------------------------------------------------------------|
| Introduction researcher  | Introduction interviewer, research group and sign informed consent           |
| Introduction participant | Characteristics of general practitioner                                      |
| Prevention               | Thoughts on role of GP in prevention                                         |
| Lifestyle interventions  | View on lifestyle interventions                                              |
| CLIs                     | Awareness and knowledge of CLIs, view on CLIs                                |
| Experiences              | Experiences with lifestyle interventions, lifestyle coaches and CLIs         |
| Effectiveness            | Belief in effectiveness of CLIs, their added value on current care provision |
| Intention                | Intention of referring to CLI coaches, benefit of reimbursement              |
| Implementation           | Facilitators and barriers for implementation, ideal implementation           |
| Feedback on interview    | Feedback of participant on topics and questions                              |

## Ethics

The medical ethics committee of the Amsterdam UMC (location AMC) granted a waiver for this study (reference number NL68852.018.19). In line with Dutch legislation, this committee ruled that the study did not require extensive ethical review as participants were recruited on a volunteer basis and were not requested to undergo any physical examination or intervention.

## Recruitment

Fifteen GPs across a diversity of primary care practices were purposively recruited for semi-structured interviews. Purposive sampling was used to enable balance for the following GP characteristics: gender (M/F), working experience (0-10, >10 years) type of general practice (health care centre: Y/N, part of care group: Y/N). Health care centres were defined as multiple GP practices with additional primary care providers (including practice nurses, physical therapists, dieticians, etc.). Care groups were defined as local or regional GP networks, involved in shared contracts on chronic care delivery with health insurance companies (26). Recruitment of GPs took place through snowballing, covering a large geographical area of the Netherlands to ensure sufficient contrasts. Invitations were sent by email, followed by an information letter after a positive reply. The interviews took place between February and April 2019. Overall, 15 GPs were willing to take part in an interview. In line with the Amsterdam UMC code of good conduct in medical research (27), provisions were made to assure the anonymity of the respondents in data collection, analysis and presentation.

## Data collection

All interviews were conducted face to face at the GP practice by WH, a medical student in the final phase of training. The interviews lasted about half an hour on average. The researcher verified whether the participant had read the information letter, before asking for written consent. All interviews were audio recorded with participants' permission. After interim analysis based on half of the interviews, one topic was added to the interview guide, to obtain a deeper understanding what constitutes optimal implementation of CLIs in daily practice. To increase content validity, the GPs were asked for feedback after each interview, about the relevance of the research questions and suggestions for additional questions. The input was used to make further adjustments to wording and sequencing of the topic guide for subsequent interviews. GPs received a small reimbursement (gift voucher) for their participation. Since most of them were relatively unfamiliar with the CLI, two additional GPs who gained clear experience with the CLI were recruited and interviewed. Thematic saturation (28) was verified in consultation with the research team and occurred after 15 interviews.

## Data analysis

The framework method for qualitative research was followed for a systematic approach of data analysis (29). This comprised the stages of transcription, familiarisation, coding, applying the framework and interpretation. All but one of the interviews were transcribed verbatim. One audio recording failed due to a technical error. Instead of being transcribed, WH summarised the conversation immediately after the interview. Familiarisation with the data took place during transcription and by reading the transcripts in detail. In parallel, the interview guide was discussed and refined by the research team. Transcripts were coded using both an inductive and deductive approach with supporting qualitative data analysis software ATLAS.ti 8 (30). Two separate researchers (WH & JL) coded the transcripts, starting with an



1  
2  
3 inductive open coding phase, identifying categories and applying a code to a line or  
4 paragraph. After the first three transcripts, these open codes were deductively mapped onto  
5 the categories of the TAM model (22), creating a coding scheme. When a code did not fit the  
6 model, a new category was created, capturing the essence of the code. After the full research  
7 team agreed on the identified categories and codes, the final coding scheme emerged, which  
8 then was applied on all transcripts. The research team read all (WH & JL) or a subset of the  
9 coded transcripts (EMvC & EB), discussed them among the team members and established the  
10 level of data saturation. The Standards for Reporting Qualitative Research (SRQR) were used  
11 as guideline for appropriate reporting (31).  
12  
13  
14  
15  
16  
17  
18  
19  
20  
21  
22  
23  
24  
25  
26  
27  
28  
29  
30  
31  
32  
33  
34  
35  
36  
37  
38  
39  
40  
41  
42  
43  
44  
45  
46  
47  
48

## 49 **Results**

### 51 **Sample of GPs**

52 An overview of the characteristics of the 15 GPs in the purposive sample is presented in table  
53 2. During analysis, the experience with referring patients to CLIs emerged, to substantially  
54 influence GPs' view on lifestyle interventions and potential barriers and facilitators. Therefore,  
55 the study team decided to include this characteristic as an additional sampling criterion.  
56  
57  
58

### 59 **Table 2.** GP characteristics

| Characteristics                   | N  | %   |
|-----------------------------------|----|-----|
| Gender                            |    |     |
| Male                              | 6  | 40% |
| Female                            | 9  | 60% |
| Age                               |    |     |
| 30-40                             | 6  | 40% |
| 40-50                             | 5  | 33% |
| 50-65                             | 4  | 27% |
| Years of working experience       |    |     |
| 0-10                              | 8  | 53% |
| >10                               | 7  | 47% |
| General practice in health centre |    |     |
| Yes                               | 7  | 47% |
| No                                | 8  | 53% |
| Practice part of a care group     |    |     |
| Yes                               | 7  | 47% |
| No                                | 8  | 53% |
| Experience with CLIs              |    |     |
| Hardly any experience             | 11 | 73% |
| Little experience                 | 2  | 13% |
| Experienced                       | 2  | 13% |

### Perceptions, intentions and behaviour of GPs

Three major themes that describe the perceptions, intentions and behaviour of GPs related to the implementation of CLIs in primary care emerged from the interview analysis: 1) Relevance and use of lifestyle interventions in general, 2) Relevance and use of CLIs, and 3) Barriers and facilitators to implementation of CLIs. Each theme included various subthemes, as summarised in table 3.

**Table 3.** Themes and subthemes in results

| Themes                                                  | Subthemes                                                                                               |
|---------------------------------------------------------|---------------------------------------------------------------------------------------------------------|
| Relevance and use of lifestyle interventions in general | GPs' role in lifestyle modification interventions<br>Perceived effectiveness of lifestyle interventions |
| Relevance and use of combined lifestyle interventions   | Awareness of CLI<br>Perceived effectiveness of CLI<br>Experiences with CLI                              |
| Barriers and facilitators to implementation of CLIs     | Barriers<br>Facilitators                                                                                |

### Relevance and use of lifestyle interventions in general

GPs' views on the relevance of lifestyle interventions and their current use in daily practice was influenced by their opinion about the role a GP should play in lifestyle support as well as the perceived effectiveness of lifestyle interventions.

### *GPs' role in lifestyle modification interventions*

Prevention through lifestyle interventions was considered important by all GPs, although there was substantial variation on perceived relevance and the role of the GP in lifestyle interventions (table 4, quote 1). From the interviews, two main approaches of lifestyle support by GPs emerged. The first one focused on referral of eligible patients to qualified professionals for further lifestyle coaching (table 4, quote 2). The second approach was followed by GPs taking an active role in guidance on healthy lifestyles themselves (table 4, quote 3). One of the interviewees believed achieving a healthy lifestyle was a responsibility that primarily lied with patients themselves, without the need to provide large-scale support and coaching (table 4, quote 4). Next to their own role, GPs felt that the national government plays an important role in prevention, mainly through policies and regulations promoting a healthy lifestyle, e.g. raising taxes on unhealthy food products (table 4, quote 5). GPs' own experiences with lifestyle support appeared to have a positive effect on their judgement of this type of care provision, due to the stimulating effect of ample positive feedback from their patients and the health results that were achieved. (e.g. on quit smoking, lost weight, increased exercise or reduced or stopped medication) (table 4, quote 6).

### *Perceived effectiveness of lifestyle interventions*

One of the main factors driving the judgement on lifestyle programs was the GP's perceived effectiveness of these interventions. Quality of the coaches in the lifestyle interventions and intensity (duration and number of sessions) of the programs substantially influenced the perceived effectiveness (table 4, quote 7). Patient's motivation also was an important prerequisite for effectiveness of lifestyle interventions. Most GPs considered it their responsibility to motivate participants, but some felt that without a certain motivation level any attempt would be useless. GPs only considered coaching or referring patients who clearly demonstrated commitment to actively work on their lifestyle (table 4, quote 8).

### **Relevance and use of combined lifestyle interventions**

Only few GPs were well aware of the recently introduced CLI-programs and almost no one had experience with referring patients to a CLI. The perceived effectiveness of CLIs varied.

### *Awareness of CLI*

Only few GPs appeared to be well informed on the concept of a certified coach and lifestyle groups for weight reduction for obese patients with high cardiovascular risk profile. GPs indicated that more understanding of the proposed multi-component interventions was necessary to facilitate their referral of patients to such programs (table 4, quote 9). For GPs it was not always clear which patients were eligible for participation in CLIs. The interviews revealed that GPs had a more positive attitude towards the program when they had an unequivocal understanding for which of their patients CLI was intended (table 4, quote 10).

### *Perceived effectiveness of CLI*

GPs believed CLIs to be effective. However, they were sceptical about the added value of such interventions above and beyond the already well-established support offered by existing qualified paramedical health care professionals, such as physiotherapists, dieticians or practice nurses. GPs without prior experience with CLI felt that the introduction of a lifestyle coach might even complicate referral procedures (table 4, quote 11). Finally, GPs often expressed doubts on the long-term effect of CLIs, despite a potential beneficial short-term effect in behavioural change. (table 4, quote 12).

### Experiences with CLI

The four GPs who had gained some experience with CLIs and lifestyle coaches worked within care groups which had contracted this type of care (table 4, quote 13). All of them were positive on the group sessions being part of the CLIs and were convinced of the added value of these group sessions on current lifestyle care (table 4, quote 14).

### Barriers and facilitators to implementation of CLIs

The interviews revealed several factors that may affect successful implementation of CLI.

#### Barriers

Most GPs indicated already providing lifestyle advice on a daily basis and therefore were not always convinced that CLIs would have an additional value (table 4, quote 15). The limited budget health insurance companies received from the government was seen as a major barrier for CLI implementation, yielding insufficient room to cover the eligible high-risk population within their practice population (table 4, quote 16). Lack of convincing scientific evidence on effectiveness was also mentioned as a barrier to implementation. Therefore, GPs proposed to test CLIs in a trial first, before the government would take a final decision on large-scale funding of such programs in the health care landscape. Finally, lack of visibility of CLI-offering organisations in the close vicinity of the practice, as well as shortage of certified lifestyle coaches were mentioned as barriers to make use of CLIs.

#### Facilitators

GPs indicated that successful implementation of CLIs would mainly depend on long-term financial and organisational support (table 4, quote 17). Other prerequisites for a successful program were adequate, centralised coordination of the implementation, and continuous monitoring and evaluation of the program with key stakeholders, including GPs (table 4, quote 18). This preference was emphasised by the GPs who had already worked with CLIs (table 4, quote 19).

**Table 4.** Quotes by general practitioners

| Quotes per theme with characteristics of the GP |                                                                                                                                                                                                                                                                                                                                                                            |
|-------------------------------------------------|----------------------------------------------------------------------------------------------------------------------------------------------------------------------------------------------------------------------------------------------------------------------------------------------------------------------------------------------------------------------------|
| Theme                                           | Relevance and use of lifestyle interventions in general                                                                                                                                                                                                                                                                                                                    |
| Subtheme                                        | GPs' role in lifestyle modification interventions                                                                                                                                                                                                                                                                                                                          |
| 1                                               | <i>I think it is our job (as GPs) to ensure that people become as healthy as possible, function as well as possible, but also remain as healthy as possible.</i><br>- GP 2, Male                                                                                                                                                                                           |
| 2                                               | <i>When you want to do something with lifestyle, you often refer to the dietician or physical therapist for example. Nowadays, it's often embedded in a chronic care program, such as the one for diabetes.</i><br>- GP 7, Male                                                                                                                                            |
| 3                                               | <i>I actually experiment with lifestyle support myself, for example by doing a one-hour lifestyle consultation, to discuss all kinds of lifestyle-related issues in more detail. I am busy with all kinds of projects, together with social work, physiotherapists, dieticians and lifestyle coach-like people, from which a nice network has emerged.</i><br>- GP 2, Male |
| 4                                               | <i>I think the best thing is if patients take control themselves. Without the help of other care providers (besides GPs), becoming more independent and stronger and taking it into their own hands.</i><br>- GP 3, Male                                                                                                                                                   |
| 5                                               | <i>I think the government has a big role in imposing taxes and other smart things. How products are displayed in the supermarket, the locations of snack bars... instead of leaving it up to the medical care.</i><br>- GP 13, Male                                                                                                                                        |

|          |                                                                                                                                                                                                                                                                                                                                                                                                                                     |
|----------|-------------------------------------------------------------------------------------------------------------------------------------------------------------------------------------------------------------------------------------------------------------------------------------------------------------------------------------------------------------------------------------------------------------------------------------|
| 6        | <i>You see that people can get rid of their medication, that HbA1c has gone down, that blood pressure is improving, that people are losing weight, that kind of things. That shows me that it is effective.</i><br>- GP 2, Male                                                                                                                                                                                                     |
| Subtheme | <b>Perceived effectiveness of lifestyle interventions</b>                                                                                                                                                                                                                                                                                                                                                                           |
| 7        | <i>It obviously depends on the intervention, how many contact moments there are for communication and weighing. Besides that, when such a program ends, are people left to themselves again or do they still have follow-up meetings regularly? Of course, we know from research that behaviour change takes time. If it is a very short intervention without any follow-up, it is not going to be effective.</i><br>- GP 1, Female |
| 8        | <i>Lifestyle interventions can be extremely effective in risk reduction. However, that definitely requires patient's motivation. Unfortunately, many think it will be arranged for them if they start with something like that (CLI). Of course, that's not the case. You get information, you get advice, you get a helping hand, but in the end, you have to do it yourself.</i><br>- GP 15, Female                               |
| Theme    | <b>Relevance and use of combined lifestyle interventions</b>                                                                                                                                                                                                                                                                                                                                                                        |
| Subtheme | <b>Awareness of CLI</b>                                                                                                                                                                                                                                                                                                                                                                                                             |
| 9        | <i>I need to know more about it (CLI) and have clearer and more specific information about it... I think if I know more about it, someone explains me more clearly what will be reimbursed or not, what the investment is for the patient, what happens if they drop out, then I might be able to do something with it.</i><br>- GP 10, Male                                                                                        |
| 10       | <i>I do have a number of patients in mind who are overweight or obese and if the CLI might be a solution for them, that would be great.</i><br>- GP 7, Male                                                                                                                                                                                                                                                                         |
| Subtheme | <b>Perceived effectiveness of CLI</b>                                                                                                                                                                                                                                                                                                                                                                                               |
| 11       | <i>Whatever they are going to do, lifestyle coaches must refer too. They are not dietitians, physiotherapists, nor psychologists themselves.</i><br>- GP 4, Female                                                                                                                                                                                                                                                                  |
| 12       | <i>I'm always a little afraid of a temporary effect only. After 2 years, that (CLI) is stopped and then people can easily fall back into old behavioural patterns. That is the problem with groups, as long as they are together, it is going well, but I think it is very difficult to maintain the lifestyle changes afterwards.</i><br>- GP 4, Female                                                                            |
| Subtheme | <b>Experiences with CLI</b>                                                                                                                                                                                                                                                                                                                                                                                                         |
| 13       | <i>We refer people with cardiovascular diseases to lifestyle groups and recently we have also started referring overweight people to the combined lifestyle intervention.</i><br>- GP 15, Female                                                                                                                                                                                                                                    |
| 14       | <i>It's nice to hear the experiences of other people, to hear that others struggle with the same problems. Sometimes people get to know each other, pick things up together, have each other's support. So, I think it is certainly not for everyone, but it is very useful for quite a lot of people.</i><br>- GP 14, Female                                                                                                       |
| Theme    | <b>Barriers and facilitators to implementation of CLIs</b>                                                                                                                                                                                                                                                                                                                                                                          |
| Subtheme | <b>Barriers</b>                                                                                                                                                                                                                                                                                                                                                                                                                     |
| 15       | <i>In all honesty, I think prevention is always a complicated issue in general practice. We're busy with prevention all day long, giving lifestyle advice throughout the day. That is what I also think with this CLI, it is what we are already doing all the time, isn't it? What more can we offer?</i><br>- GP 5, Female                                                                                                        |
| 16       | <i>It (CLI) will not get off the ground, because they have deliberately limited the budget.</i><br>- GP 13, Male                                                                                                                                                                                                                                                                                                                    |

| Subtheme | Facilitators                                                                                                                                                                                                                                                                                                                                                                                                                          |
|----------|---------------------------------------------------------------------------------------------------------------------------------------------------------------------------------------------------------------------------------------------------------------------------------------------------------------------------------------------------------------------------------------------------------------------------------------|
| 17       | <p><i>I hope that when health insurance companies say we will reimburse it, they will do so for at least 5 years or so. That there is the opportunity to build something and have success with it. Because I think, it takes around 2-3 years before such a new measure is picked up a bit.</i></p> <p><b>- GP 1, Female</b></p>                                                                                                      |
| 18       | <p><i>Actually, you would like to have a step-by-step plan that we need to go through, but also someone who coordinates that a bit. An external person might be practical... who will consciously implement it... I think that would be a kind of ideal picture.</i></p> <p><b>- GP 2, Male</b></p>                                                                                                                                   |
| 19       | <p><i>You need someone who takes care of the organisation. A GP cooperative is quite an appropriate organisation for that, I think. Someone who examines: do we have lifestyle coaches in the region, how are we going to get more, how are we going to arrange referrals from general practitioners to lifestyle coaches and how do we ensure that they become known to general practitioners?</i></p> <p><b>- GP 14, Female</b></p> |

## Discussion

### Main findings

In this study, we explored GPs' views on the implementation of combined lifestyle interventions (CLIs) in primary care, from an early moment of the introduction of the reimbursement policy in the Netherlands. Most GPs acknowledge the relevance and importance of lifestyle support across a broad spectrum of patients. GPs' views on lifestyle support programmes were influenced by their belief in its effectiveness and their perceived professional role in preventive care. In addition, this appeared to be closely related to the way they put personal lifestyle guidance into practice, or to referrals to health care professionals to deliver such care, including CLI coaches. According to GPs, the implementation of CLIs fell short on several levels. First, the communication from the providers about the content of the CLIs, and on its effectiveness was not entirely clear. GPs were not always convinced of the added value of such programs above and beyond the existing lifestyle support already offered by paramedical professionals (e.g. physiotherapists, dieticians). Second, the amount of available budget for CLI reimbursement was perceived to be insufficient to cover the costs of the large group of eligible patients. The CLI reimbursement policy was also perceived as a potential threat to other, already established, health care professions and lifestyle interventions. Third, limited capacity of CLI coaches in the proximity of the GP practice, as well as a lack of coordination of the implementation of CLI programmes was regarded as a potential barrier to their adoption. According to the GPs, a well-coordinated introduction of

1  
2  
3 CLIs for GP practices would facilitate early adoption and implementation. GPs indicated that  
4 continuous monitoring and evaluation of the programme should be available, to create an  
5 evidence base on the long-term effectiveness. This is needed to justify and facilitate the  
6 allocation of sufficient budget for reimbursement of CLIs for all potentially eligible  
7 participants.  
8  
9

### 10 **Related work**

11 In line with our findings, previous research on the implementation of lifestyle support in  
12 primary care by GPs has shown that GPs vary in the way they engage in providing lifestyle  
13 support, ranging from actively providing lifestyle support themselves to signalling need for  
14 lifestyle support and referring to other healthcare professionals (31–33). Several barriers in  
15 providing lifestyle support by GPs have been described in earlier studies. First, GPs experience  
16 high workload, lack of time and lack of finances (31–34). Second, in the current literature,  
17 overall (long-term) effectiveness of lifestyle interventions appears to be limited (15,31,33,35–  
18 38). This was expressed by several GPs in our study.

19 This study also identified a lack of awareness among GPs about the CLI and its reimbursement  
20 policy. Previous studies showed that sufficient awareness and knowledge among GPs of both  
21 the content and the effectiveness of new programs is important for a positive attitude towards-  
22 and successful adoption of healthcare innovations (31,34,39,40). Education and early  
23 involvement of key stakeholders (e.g. those needed for the implementation of the innovation)  
24 has shown to enhance adoption (34,41–44). Thus, increasing awareness and knowledge about  
25 CLIs among GPs is crucial to support its implementation. As such, active involvement of GPs  
26 in the implementation of the CLI might have improved early adoption of the subject of this  
27 study, i.e. the new CLI policy. Finally, the availability of sufficient resources to provide the  
28 newly introduced interventions in the care provision context, has also been shown to be crucial  
29 for successful adoption (41,45).  
30  
31  
32  
33  
34  
35

### 36 **Strengths and limitations**

37 The timing of this study was at an opportune moment, as an intervention for primary care  
38 became available in real life, in order to observe to what extent a new policy was being  
39 leveraged. This made it possible to explore and understand facilitators and barriers for  
40 adoption in an early stage of implementation. These first experiences and expectations can  
41 inform the guidance of the further development of its implementation. However, this may also  
42 be a limitation, as this could potentially have led to an underestimation of its still developing  
43 application by GPs in this early stage. Another limitation of our study is that it focused on GP's  
44 perspectives only, while the views of other stakeholders, including patients, health insurance  
45 companies or lifestyle coaches, could have led to more comprehensive insights on the  
46 dynamics of CLI implementation.  
47  
48  
49

### 50 **Conclusion and implications**

51 This study showed that the early adoption and implementation of CLIs in primary care in the  
52 Netherlands is challenging. Although GPs acknowledged the importance of lifestyle support  
53 in general, the awareness of CLIs was still limited. At the same time, doubts about their  
54 effectiveness, their added value on top of already existing lifestyle support interventions and  
55 the lack of resources to realise the CLI in practice, hindered their adoption. Policy makers,  
56 together with the developers of the CLIs, should pay attention to the adequate promotion of  
57 new CLIs and the early involvement of key stakeholders. In addition, the available financial  
58 and professional resources to realise the CLI in practice for the large group of potentially  
59  
60

1  
2  
3 eligible people must also be considered. Finally, attention should also be paid to the alignment  
4 with existing programs for lifestyle support and preventive services in primary care. Proper  
5 monitoring and evaluation of CLIs may elucidate its long-term effectiveness and room for  
6 improvement.  
7  
8  
9  
10  
11  
12  
13  
14  
15  
16  
17  
18  
19  
20  
21  
22  
23  
24  
25  
26  
27  
28  
29  
30  
31  
32  
33  
34  
35  
36  
37  
38  
39  
40  
41  
42  
43  
44  
45  
46  
47  
48  
49  
50  
51  
52  
53

### 54 **Acknowledgments**

55 The authors gratefully acknowledge all the GPs who shared their experiences and insights in  
56 order that we could understand to what extent a new policy regarding the CLIs in the  
57 Netherlands was being leveraged.  
58  
59  
60



### Author contributions

- WH designed the study in collaboration with the research team, created the interview guide, led the qualitative data collection and conducted and transcribed the interviews, then coded all transcripts and has analysed the data in collaboration with the research team.
- JL assisted in the study design, recruited participants, finetuned the interview guide, coded transcripts and contributed to the interpretation of data and editing of the article.
- EMvC assisted in the study design, recruited participants, coded transcripts and contributed to the interpretation of data and editing of the article.
- EB assisted in the study design, recruited participants, coded transcripts and contributed to the interpretation of data and editing of the article.
- All authors provided feedback on the manuscript and approval to the publishing of this manuscript.

### Funding statement

Funding for this qualitative research has been provided by the Department of Public & Occupational health of Amsterdam UMC and Philips Research Eindhoven.

### Competing interests

The authors have no competing interests to declare.

### Data availability statement

The data is stored in a secure environment of the Amsterdam UMC. If necessary, data can be requested from E.J.A.J. Beune (Department of Public and Occupational Health, Amsterdam UMC location AMC, Meibergdreef 15, 1105 AZ Amsterdam, [e.j.beune@amc.uva.nl](mailto:e.j.beune@amc.uva.nl)).

## References

1. Berwick DM. Disseminating Innovations in Health Care. JAMA [Internet]. 2003 Apr 16;289(15):1969–75. Available from: <https://doi.org/10.1001/jama.289.15.1969>
2. Michie S, Johnston M, Abraham C, Lawton R, Parker D, Walker A. Making psychological theory useful for implementing evidence based practice: A consensus approach. *Qual Saf Heal Care*. 2005;14(1):26–33.
3. Fleuren MAH, Paulussen TGWM, Dommelen P, Buuren S Van. Towards a measurement instrument for determinants of innovations. *Int J Qual Heal Care*. 2014;26(5):501–10.
4. Fleuren M, Wiefferink K, Paulussen T. Determinants of innovation within health care organizations. *Int J Qual Heal Care*. 2004;16(2):107–23.
5. Teuscher D, Bukman AJ, Baak MA Van, Feskens EJM, Renes RJ, Meershoek A. A lifestyle intervention study targeting individuals with low socioeconomic status of different ethnic origins : important aspects for successful implementation. 2018;1–10.
6. Fischer F, Lange K, Klose K, Greiner W, Kraemer A. Barriers and Strategies in Guideline Implementation—A Scoping Review. *Healthcare*. 2016;4(3):36.
7. Peters DH, Adam T, Alonge O. Implementation research : what it is and how to do it. 2013;6753(November):1–7. Available from: <http://dx.doi.org/doi:10.1136/bmj.f6753>
8. Huis voor Beweging. Beschrijving interventie BeweegKuur. RIVM. 2015;
9. Expertisecentrum Leefstijlinterventies. Beschrijving interventie Cool. RIVM. 2015;
10. GGD Noord- en Oost-Gelderland. Beschrijving interventie SLIMMER. RIVM. 2015;
11. Seidell JC, Halberstadt J. The global burden of obesity and the challenges of prevention. *Ann Nutr Metab*. 2015;66(suppl 2):7–12.
12. World Health Organization. 10 Facts on obesity. Vol. October. 2017.
13. World Health Organization. Global Health Expenditure Database. 2016.
14. Lee IM, Shiroma EJ, Lobelo F, Puska P, Blair SN, Katzmarzyk PT, et al. Effect of physical inactivity on major non-communicable diseases worldwide: An analysis of burden of disease and life expectancy. *Lancet*. 2012;380(9838):219–29.
15. Mai K, Brachs M, Leupelt V, Jumpertz-von Schwartzberg R, Maurer L, Grütters-Kieslich A, et al. Effects of a combined dietary, exercise and behavioral intervention and sympathetic system on body weight maintenance after intended weight loss: Results of a randomized controlled trial. *Metabolism*. 2018;83:60–7.
16. König D, Hörmann J, Predel H-G, Berg A. A 12-Month Lifestyle Intervention Program Improves Body Composition and Reduces the Prevalence of Prediabetes in Obese Patients. *Obes Facts*. 2018;11(5):393–9.
17. Hassan Y, Head V, Jacob D, Bachmann MO, Diu S, Ford J. Lifestyle interventions for weight loss in adults with severe obesity: a systematic review. *Clin Obes*. 2016;6(6):395–403.
18. Duijzer G, Haveman-Nies A, Jansen SC, Ter Beek J, Van Bruggen R, Willink MGJ, et al. Effect and maintenance of the SLIMMER diabetes prevention lifestyle intervention in Dutch primary healthcare: A randomised controlled trial. *Nutr Diabetes*. 2017;7(5).
19. Roumen C, Blaak EE, Corpeleijn E. Lifestyle intervention for prevention of diabetes: Determinants of success for future implementation. *Nutr Rev*. 2009;67(3):132–46.
20. Schutte BAM, Haveman-Nies A, Preller L. One-year results of the Beweeg-Kuur lifestyle intervention implemented in Dutch primary healthcare settings. *Biomed Res Int*. 2015;
21. Zhang Y, Pan XF, Chen J, Xia L, Cao A, Zhang Y, et al. Combined lifestyle factors and risk of incident type 2 diabetes and prognosis among individuals with type 2 diabetes: a systematic review and meta-analysis of prospective cohort studies. *Diabetologia*. 2020;63(1):21–33.
22. Venkatesh V, Davis FD. A Theoretical Extension of the Technology Acceptance Model: Four

- 1  
2  
3 Longitudinal Field Studies. *Manage Sci.* 2003;46(2):186–204.
- 4 23. Davis FD. Perceived Usefulness, Perceived Ease of Use, and User Acceptance of Information  
5 Technology. *MIS Q.* 1989;13(0):319–40.
- 6 24. Davis FD, Bagozzi RP, Warshaw PR. User Acceptance of Computer Technology: A  
7 Comparison of Two Theoretical Models. *Manage Sci.* 2008;35(8):982–1003.
- 8 25. Holden RJ, Karsh B-T. The technology acceptance model: its past and its future in health care. *J*  
9 *Biomed Inform.* 2010;43(1):159–72.
- 10 26. Tikkanen R et al. International Health Care System Profiles - Netherlands. Vol. 6, *Journal of the*  
11 *American Board of Family Medicine.* 2020.
- 12 27. Independence in Scientific Research: Research Code AMC–VUmc. 2019.
- 13 28. Saunders B, Sim J, Kingstone T, Baker S, Waterfield J, Bartlam B, et al. Saturation in qualitative  
14 research: exploring its conceptualization and operationalization. *Qual Quant.* 2018;52(4):1893–  
15 907.
- 16 29. Gale NK, Heath G, Cameron E, Rashid S, Redwood S. Using the framework method for the  
17 analysis of qualitative data in multi-disciplinary health research. *BMC Med Res Methodol.*  
18 2013;13:117.
- 19 30. ATLAS.ti 8. p. <https://atlasti.com/>.
- 20 31. Geense WW, Glind IM Van De, Visscher TLS, Achterberg T Van. Barriers, facilitators and  
21 attitudes influencing health promotion activities in. *BMC Fam Pract.* 2013;14(20).
- 22 32. Ampt AJ, Amoroso C, Harris MF, McKenzie SH, Rose VK, Taggart JR. Attitudes, norms and  
23 controls influencing lifestyle risk factor management in general practice. *BMC Fam Pract.*  
24 2009;10:1–8.
- 25 33. Rubio-Valera M, Pons-Vigués M, Martínez-Andrés M, Moreno-Peral P, Berenguera A,  
26 Fernández A. Barriers and facilitators for the implementation of primary prevention and health  
27 promotion activities in primary care: A synthesis through meta-ethnography. *PLoS One.*  
28 2014;9(2).
- 29 34. Molema CCM, Schegget S, Schuit AJ, Goor LAM Van De. Perceived barriers and facilitators of  
30 the implementation of a combined lifestyle intervention with a financial incentive for  
31 chronically ill patients. 2019;1–11.
- 32 35. Sebo P, Maisonneuve H, Fournier J-P, Senn N, Haller DM. General practitioners' views and  
33 preferences about quality improvement feedback in preventive care: a cross-sectional study in  
34 Switzerland and France. *Implement Sci.* 2017;12(1):95.
- 35 36. Brotonsc C, Björkelund C, Bulc M, Ciurana R, Godycki-Cwirko M, Jurgova E, et al. Prevention  
36 and health promotion in clinical practice: The views of general practitioners in Europe. *Prev*  
37 *Med (Baltim).* 2005;40(5):595–601.
- 38 37. Verberne LDM, Hendriks MRC, Rutten GM, Spronk I, Savelberg HHCM, Veenhof C, et al.  
39 Evaluation of a combined lifestyle intervention for overweight and obese patients in primary  
40 health care: A quasi-experimental design. *Fam Pract.* 2016;33(6):671–7.
- 41 38. Haw JS, Galaviz KI, Straus AN, Kowalski AJ, Magee MJ, Weber MB, et al. Long-term  
42 sustainability of diabetes prevention approaches: A systematic review and meta-analysis of  
43 randomized clinical trials. *JAMA Intern Med.* 2017;177(12):1808–17.
- 44 39. Alayli A, Krebs F, Lorenz L, Nawabi F, Bau A, Lück I, et al. Evaluation of a computer-assisted  
45 multi- professional intervention to address lifestyle-related risk factors for overweight and  
46 obesity in expecting mothers and their infants : protocol for an effectiveness- implementation  
47 hybrid study. 2020;1–13.
- 48 40. Helmink JHM, Kremers SPJ, Van Boekel LC, Van Brussel-Visser FN, De Vries NK. Factors  
49 determining the motivation of primary health care professionals to implement and continue  
50 the “Beweegkuur” lifestyle intervention programme. *J Eval Clin Pract.* 2012;18(3):682–8.
- 51 41. Grol R, Grimshaw J. From best evidence to best practice : effective implementation of change in  
52 patients ' care. *Res into Pract.* 2003;362:1225–30.
- 53 42. Beune EJAJ, Haafkens JA, Bindels PJE. Barriers and enablers in the implementation of a

- 1  
2  
3 provider-based intervention to stimulate culturally appropriate hypertension education.  
4 Patient Educ Couns. 2011;82(1):74–80.
- 5  
6 43. Kingma AEC, van Stel HF, Oudega R, Moons KGM, Geersing GJ. Multi-faceted  
7 implementation strategy to increase use of a clinical guideline for the diagnosis of deep venous  
8 thrombosis in primary care. Fam Pract. 2017;34(4):446–51.
- 9  
10 44. Van Rinsum C, Gerards S, Rutten G, Johannesma M, Van De Goor I, Kremers S. The  
11 implementation of the coaching on lifestyle (CooL) intervention: Lessons learnt. BMC Health  
12 Serv Res. 2019;19(1):1–12.
- 13  
14 45. Laws RA, Kemp LA, Harris MF, Davies GP, Williams AM, Eames-Brown R. An exploration of  
15 how clinician attitudes and beliefs influence the implementation of lifestyle risk factor  
16 management in primary healthcare: A grounded theory study. Implement Sci. 2009;4(1):1–15.  
17  
18  
19  
20  
21  
22  
23  
24  
25  
26  
27  
28  
29  
30  
31  
32  
33  
34  
35  
36  
37  
38  
39  
40  
41  
42  
43  
44  
45  
46  
47  
48  
49  
50  
51  
52  
53  
54  
55  
56  
57  
58  
59  
60

For peer review only

## Standards for Reporting Qualitative Research (SRQR)

O'Brien B.C., Harris, I.B., Beckman, T.J., Reed, D.A., & Cook, D.A. (2014). Standards for reporting qualitative research: a synthesis of recommendations. *Academic Medicine*, 89(9), 1245-1251.

| No.                       | Topic                                       | Item                                                                                                                                                                                                                                                                                                                                     | Page |
|---------------------------|---------------------------------------------|------------------------------------------------------------------------------------------------------------------------------------------------------------------------------------------------------------------------------------------------------------------------------------------------------------------------------------------|------|
| <b>Title and abstract</b> |                                             |                                                                                                                                                                                                                                                                                                                                          |      |
| S1                        | Title                                       | Concise description of the nature and topic of the study identifying the study as qualitative or indicating the approach (e.g., ethnography, grounded theory) or data collection methods (e.g., interview, focus group) is recommended                                                                                                   | 1    |
| S2                        | Abstract                                    | Summary of key elements of the study using the abstract format of the intended publication; typically includes objective, methods, results, and conclusions                                                                                                                                                                              | 2    |
| <b>Introduction</b>       |                                             |                                                                                                                                                                                                                                                                                                                                          |      |
| S3                        | Problem formulation                         | Description and significance of the problem/phenomenon studied; review of relevant theory and empirical work; problem statement                                                                                                                                                                                                          | 3    |
| S4                        | Purpose or research question                | Purpose of the study and specific objectives or questions                                                                                                                                                                                                                                                                                | 3    |
| <b>Methods</b>            |                                             |                                                                                                                                                                                                                                                                                                                                          |      |
| S5                        | Qualitative approach and research paradigm  | Qualitative approach (e.g., ethnography, grounded theory, case study, phenomenology, narrative research) and guiding theory if appropriate; identifying the research paradigm (e.g., positivist, constructivist/interpretivist) is also recommended                                                                                      | 4    |
| S6                        | Researcher characteristics and reflexivity  | Researchers' characteristics that may influence the research, including personal attributes, qualifications/experience, relationship with participants, assumptions, or presuppositions; potential or actual interaction between researchers' characteristics and the research questions, approach, methods, results, or transferability | 4    |
| S7                        | Context                                     | Setting/site and salient contextual factors; rationale <sup>a</sup>                                                                                                                                                                                                                                                                      | 4    |
| S8                        | Sampling strategy                           | How and why research participants, documents, or events were selected; criteria for deciding when no further sampling was necessary (e.g., sampling saturation); rationale <sup>a</sup>                                                                                                                                                  | 4    |
| S9                        | Ethical issues pertaining to human subjects | Documentation of approval by an appropriate ethics review board and participant consent, or explanation for lack thereof; other confidentiality and data security issues                                                                                                                                                                 | 4    |
| S10                       | Data collection methods                     | Types of data collected; details of data collection procedures including (as appropriate) start and stop                                                                                                                                                                                                                                 | 4-5  |

|                                                                                                  |                                                                                                                                                                                                                                                                                                       |       |
|--------------------------------------------------------------------------------------------------|-------------------------------------------------------------------------------------------------------------------------------------------------------------------------------------------------------------------------------------------------------------------------------------------------------|-------|
|                                                                                                  | dates of data collection and analysis, iterative process, triangulation of sources/methods, and modification of procedures in response to evolving study findings; rationale <sup>a</sup>                                                                                                             |       |
| S11 Data collection instruments and technologies                                                 | Description of instruments (e.g., interview guides, questionnaires) and devices (e.g., audio recorders) used for data collection; if/how the instrument(s) changed over the course of the study                                                                                                       | 4-5   |
| S12 Units of study                                                                               | Number and relevant characteristics of participants, documents, or events included in the study; level of participation (could be reported in results)                                                                                                                                                | 4     |
| S13 Data processing                                                                              | Methods for processing data prior to and during analysis, including transcription, data entry, data management and security, verification of data integrity, data coding, and anonymization/deidentification of excerpts                                                                              | 5     |
| S14 Data analysis                                                                                | Process by which inferences, themes, etc., were identified and developed, including researchers involved in data analysis; usually references a specific paradigm or approach; rationale <sup>a</sup>                                                                                                 | 5     |
| S15 Techniques to enhance trustworthiness                                                        | Techniques to enhance trustworthiness and credibility of data analysis (e.g., member checking, audit trail, triangulation); rationale <sup>a</sup>                                                                                                                                                    | 4-5   |
| <b>Results/Findings</b>                                                                          |                                                                                                                                                                                                                                                                                                       |       |
| S16 Synthesis and interpretation                                                                 | Main findings (e.g., interpretations, inferences, and themes); might include development of a theory or model, or integration with prior research or theory                                                                                                                                           | 10    |
| S17 Links to empirical data                                                                      | Evidence (e.g., quotes, field notes, text excerpts, photographs) to substantiate analytic findings                                                                                                                                                                                                    | 8-9   |
| <b>Discussion</b>                                                                                |                                                                                                                                                                                                                                                                                                       |       |
| S18 Integration with prior work, implications, transferability, and contribution(s) to the field | Short summary of main findings; explanation of how findings and conclusions connect to, support, elaborate on, or challenge conclusions of earlier scholarship; discussion of scope of application/generalizability; identification of unique contribution(s) to scholarship in a discipline or field | 10    |
| S19 Limitations                                                                                  | Trustworthiness and limitations of findings                                                                                                                                                                                                                                                           | 10-11 |
| <b>Other</b>                                                                                     |                                                                                                                                                                                                                                                                                                       |       |
| S20 Conflicts of interest                                                                        | Potential sources of influence or perceived influence on study conduct and conclusions; how these were managed                                                                                                                                                                                        | 12    |
| S21 Funding                                                                                      | Sources of funding and other support; role of funders in data collection, interpretation, and reporting                                                                                                                                                                                               | 12    |

<sup>a</sup>The rationale should briefly discuss the justification for choosing that theory, approach, method, or technique rather than other options available, the assumptions and limitations implicit in those choices, and how those choices influence study conclusions and transferability. As appropriate, the rationale for several items might be discussed together.

# BMJ Open

## **GPs' views on the implementation of combined lifestyle interventions in primary care in the Netherlands: a qualitative study.**

|                                 |                                                                                                                                                                                                                                                                                                                                                                                                                                                                                                                                                                              |
|---------------------------------|------------------------------------------------------------------------------------------------------------------------------------------------------------------------------------------------------------------------------------------------------------------------------------------------------------------------------------------------------------------------------------------------------------------------------------------------------------------------------------------------------------------------------------------------------------------------------|
| Journal:                        | <i>BMJ Open</i>                                                                                                                                                                                                                                                                                                                                                                                                                                                                                                                                                              |
| Manuscript ID                   | bmjopen-2021-056451.R1                                                                                                                                                                                                                                                                                                                                                                                                                                                                                                                                                       |
| Article Type:                   | Original research                                                                                                                                                                                                                                                                                                                                                                                                                                                                                                                                                            |
| Date Submitted by the Author:   | 14-Nov-2021                                                                                                                                                                                                                                                                                                                                                                                                                                                                                                                                                                  |
| Complete List of Authors:       | van der Heiden, W.; Amsterdam Public Health Research Institute, Department of Public & Occupational Health; Philips Research, Department of Digital Engagement, Cognition and Behavior<br>Lacroix, J.P.W.; Philips Research, Department of Digital Engagement, Cognition and Behavior<br>Moll van Charante, Eric P; Amsterdam UMC Locatie AMC, Department of General Practice; Amsterdam Public Health Research Institute, Department of Public & Occupational Health<br>Beune, Erik; Amsterdam Public Health Research Institute, Department of Public & Occupational Health |
| <b>Primary Subject Heading</b>: | General practice / Family practice                                                                                                                                                                                                                                                                                                                                                                                                                                                                                                                                           |
| Secondary Subject Heading:      | Public health, Qualitative research, General practice / Family practice                                                                                                                                                                                                                                                                                                                                                                                                                                                                                                      |
| Keywords:                       | PRIMARY CARE, PREVENTIVE MEDICINE, PUBLIC HEALTH, QUALITATIVE RESEARCH                                                                                                                                                                                                                                                                                                                                                                                                                                                                                                       |
|                                 |                                                                                                                                                                                                                                                                                                                                                                                                                                                                                                                                                                              |

SCHOLARONE™  
Manuscripts



I, the Submitting Author has the right to grant and does grant on behalf of all authors of the Work (as defined in the below author licence), an exclusive licence and/or a non-exclusive licence for contributions from authors who are: i) UK Crown employees; ii) where BMJ has agreed a CC-BY licence shall apply, and/or iii) in accordance with the terms applicable for US Federal Government officers or employees acting as part of their official duties; on a worldwide, perpetual, irrevocable, royalty-free basis to BMJ Publishing Group Ltd ("BMJ") its licensees and where the relevant Journal is co-owned by BMJ to the co-owners of the Journal, to publish the Work in this journal and any other BMJ products and to exploit all rights, as set out in our [licence](#).

The Submitting Author accepts and understands that any supply made under these terms is made by BMJ to the Submitting Author unless you are acting as an employee on behalf of your employer or a postgraduate student of an affiliated institution which is paying any applicable article publishing charge ("APC") for Open Access articles. Where the Submitting Author wishes to make the Work available on an Open Access basis (and intends to pay the relevant APC), the terms of reuse of such Open Access shall be governed by a Creative Commons licence – details of these licences and which [Creative Commons](#) licence will apply to this Work are set out in our licence referred to above.

Other than as permitted in any relevant BMJ Author's Self Archiving Policies, I confirm this Work has not been accepted for publication elsewhere, is not being considered for publication elsewhere and does not duplicate material already published. I confirm all authors consent to publication of this Work and authorise the granting of this licence.



# GPs' views on the implementation of combined lifestyle interventions in primary care in the Netherlands: a qualitative study.

W. van der Heiden<sup>1,2</sup>, J.P.W. Lacroix<sup>2</sup>, E.P. Moll van Charante<sup>1,3</sup>, E.J.A.J. Beune<sup>1</sup>

<sup>1</sup> Department of Public & Occupational Health, Amsterdam UMC, University of Amsterdam, Amsterdam, Amsterdam Public Health Research Institute, Amsterdam, the Netherlands.

<sup>2</sup> Department of Digital Engagement, Cognition and Behavior, Philips Research, Eindhoven, the Netherlands.

<sup>3</sup> Department of General Practice, Amsterdam UMC, University of Amsterdam, Amsterdam, the Netherlands.

## For correspondence:

E.J.A.J. Beune

Department of Public & Occupational Health

Amsterdam UMC, University of Amsterdam

Meibergdreef 9

1105 AZ Amsterdam

The Netherlands

Tel: +31650063324

E-mail: [e.j.beune@amsterdamumc.nl](mailto:e.j.beune@amsterdamumc.nl)

## Word count:

4300 words

## Abstract

### Objectives

Prevention and lifestyle support are emerging topics in general practice. Healthcare insurance companies reimburse combined lifestyle interventions (CLIs) in the Netherlands since January 2019. CLIs support people with overweight (BMI 25-30) or obesity (BMI >30) to reduce weight in peer groups. General practitioners (GPs) are key in the successful implementation of lifestyle interventions in primary care. This study explored GPs' experiences and views on the implementation of CLIs to identify barriers and facilitators to the successful implementation in primary care.

### Design

Qualitative study using semi-structured interviews. Content analysis consisted of thematic coding and mapping a first stage of predefined- and second stage of iterative evolving set of themes.

### Setting

GPs were interviewed in a variety of primary care practices between February and April 2019.

### Participants

Fifteen GPs were purposively recruited for semi-structured interviews through snowballing.

### Results

Experiences with lifestyle support among GPs ranged from referring patients to other healthcare professionals to taking a proactive role in lifestyle support themselves. Whether or not GPs took an active role in lifestyle support was related to their belief in the effect of lifestyle interventions. Overall, GPs had little experience with CLI in every day practice. Perceived barriers were a lack of availability of CLIs in the region and the potential lack of added value of CLIs on top of existing lifestyle support. Perceived facilitators were coordination of care provision by GP cooperatives and monitoring of the CLI implementation and their results. Reimbursement of CLIs without any costs for participants enabled application.

### Conclusion

The importance of lifestyle interventions in primary care was acknowledged by all GPs, but they differed in their level of experience with providing lifestyle support and awareness of CLIs. Successful integration of CLIs with primary care requires a solid promotion, a well-coordinated implementation strategy and structural evaluation of long-term effectiveness.

### Strengths and limitations

- Qualitative analysis of the first experiences and expectations of healthcare interventions at an early stage can provide valuable information on barriers and facilitators to implementation.

- This is the first study to explore how general practice initially responded to a new policy regarding the combined lifestyle intervention (CLI) in the Netherlands.
- Interviews took place in a relatively early phase after the reimbursement policy started which allowed us to study initial responses to the introduction of the policy, even though overall perceptions of the GPs may have changed over time due to more experience and more public discussion related to the CLIs.
- Only GPs were interviewed and the study results may therefore not be generalisable to perspectives of other health care workers or patients.

### Keywords

Implementation, healthcare, primary care, lifestyle support, combined lifestyle intervention, general practitioner

## Introduction

Implementation of innovations in healthcare is often challenging (1). Even when evidence for a new intervention is present, the implementation takes years to be implemented (2). Implementation researchers have reported several factors that may positively or negatively influence implementation of

1  
2  
3 innovations in healthcare. These factors can be divided into a number of domains: characteristics of the  
4 innovation itself, the organisation, the socio-political context, the available resources and the adopting  
5 individual (3–5). Moreover, successful implementation largely depends on the commitment and support  
6 of involved healthcare professionals (6,7). More insight into factors influencing the process of  
7 implementation can be achieved by studying specific implementation cases (8).  
8

9 Since January 2019, healthcare insurances in de Netherlands have started to reimburse combined  
10 lifestyle interventions (CLIs) for people with overweight or obesity. The CLI is reimbursed from basic  
11 health insurance when people have a body mass index (BMI) of: 1) 25-30 and have an increased risk of  
12 cardiovascular disease or type 2 diabetes, or 2) 30 or above (9). CLIs are multicomponent interventions,  
13 which consists of interactive sessions with care professionals (e.g., a lifestyle coach, practice nurse or a  
14 paramedic). The programme is tailored to the personal needs of the participants and includes group  
15 sessions to educate participants on certain topics, share experiences and provide support (10–12).  
16 Participants receive coaching on physical activity and healthy nutrition to achieve weight reduction  
17 (13,14). The intervention takes two years, because previous research has shown that a shorter  
18 intervention is often ineffective (15,16). While in the first year, much emphasis is on guided activities,  
19 including exercise, education and sharing experiences, the second year focusses more on self-  
20 management and sustaining lifestyle changes. Lifestyle coaches, trained at a certified educational  
21 institute, are accredited to deliver CLIs to patients referred by GPs.  
22

23 General practitioners (GPs) are increasingly confronted with people with unhealthy weight in their daily  
24 practice, with approximately a quarter of the world population being overweight and one third of them  
25 being obese (17). Unhealthy weight is a major driver for chronic conditions such as diabetes and  
26 cardiovascular diseases (18), and contributes to poor quality of life and increased healthcare costs (19).  
27 Therefore, there is a growing urgency to address overweight or obesity by offering healthy lifestyle  
28 support in primary health care (20). In particular, multicomponent lifestyle interventions appear to be  
29 promising in effectively reducing overweight and obesity (21–27). Due to the new reimbursement policy  
30 for CLIs, all Dutch citizens with overweight or obesity became formally eligible for refunded  
31 participation in a CLI per January 2019.  
32

33 One important but often overlooked question is whether healthcare innovations can be successfully  
34 implemented and scaled up in practice. This study explored GPs' experiences and views on the  
35 implementation of CLIs in primary care to identify barriers and facilitators to the successful  
36 implementation and scaling of healthcare innovations in primary care. Barriers and facilitators at an  
37 early stage of implementation were identified. This knowledge may contribute to optimising  
38 implementation of CLIs and/or similar healthcare innovations into primary care.  
39  
40  
41  
42  
43  
44  
45  
46  
47  
48  
49  
50

## 51 **Method**

### 52 **Study design**

53 This qualitative study consisted of semi-structured interviews among a purposive sample of 15 GPs,  
54 guided by a topic list. The technology acceptance model (TAM) (28) was used as inspiration and  
55 framework for relevant topics for the interview guide (table 1) and coding of the transcripts. The TAM  
56 model was chosen as this was originally developed as a framework for the introduction and  
57 implementation of innovative interventions (29,30). Several TAM variations have been developed since  
58  
59  
60

the introduction of the original TAM, which have been proven useful in different research domains, including implementation research in healthcare (31).

**Table 1.** Interview topic guide

| Topics                   |                                                                              |
|--------------------------|------------------------------------------------------------------------------|
| Introduction researcher  | Introduction interviewer, research group and sign informed consent           |
| Introduction participant | Characteristics of general practitioner                                      |
| Prevention               | Thoughts on role of GP in prevention                                         |
| Lifestyle interventions  | View on lifestyle interventions                                              |
| CLIs                     | Awareness and knowledge of CLIs, view on CLIs                                |
| Experiences              | Experiences with lifestyle interventions, lifestyle coaches and CLIs         |
| Effectiveness            | Belief in effectiveness of CLIs, their added value on current care provision |
| Intention                | Intention of referring to CLI coaches, benefit of reimbursement              |
| Implementation           | Facilitators and barriers for implementation, ideal implementation           |
| Feedback on interview    | Feedback of participant on topics and questions                              |

### Ethics

The medical ethics committee of the Amsterdam UMC (location AMC) granted a waiver for this study (reference number NL68852.018.19). In line with Dutch legislation, this committee ruled that the study did not require extensive ethical review as participants were recruited on a volunteer basis and were not requested to undergo any physical examination or intervention.

### Setting

In the Netherlands, more than eighty percent of GPs share a practice with other GPs (32). Most GPs work closely with practice nurses, who support them with the care for patients with a chronic condition within the general practice, for example diabetes and cardiovascular diseases. Some of the general practices are part of a health center, which are defined as multidisciplinary primary care practices with additional primary care providers (including practice nurses, physical therapists, dieticians, etc.). In addition, general practices and/or health centres can be part of a care group, which are defined as local or regional GP networks, involved in shared contracts on chronic care delivery with health insurance companies (32).

### Recruitment

Fifteen GPs across a diversity of primary care practices were purposively recruited for semi-structured interviews. Purposive sampling was used to enable balance for the following GP characteristics: gender (M/F), working experience (0-10, >10 years) type of general practice (health care centre: Y/N, part of care group: Y/N). Recruitment of GPs took place through snowballing, covering a large geographical area of the Netherlands to ensure sufficient contrasts. Invitations were sent by email, followed by an information letter after a positive reply. The interviews took place between February and April 2019. Overall, 15 GPs took part in an interview. In line with the Amsterdam UMC code of good conduct in medical research (33), provisions were made to assure the anonymity of the respondents in data collection, analysis and presentation.

### Data collection

All interviews were conducted face to face at the GP practice by WH, a medical student in the final phase of training. The interviews lasted about half an hour on average. The researcher verified whether the participant had read the information letter, before asking for written consent. All interviews were audio recorded with participants' permission. After interim analysis based on half of the interviews, one topic was added to the interview guide, to obtain a deeper understanding what constitutes optimal implementation of CLIs in daily practice. To increase content validity, the GPs were asked for feedback after each interview, about the relevance of the research questions and suggestions for additional questions. The input was used to make further adjustments to wording and sequencing of the topic guide for subsequent interviews. GPs received a small reimbursement (gift voucher) for their participation. Since most of them were relatively unfamiliar with the CLI, two additional GPs who gained clear experience with the CLI were recruited and interviewed. The research team read all (WH & JL) or a

subset of the coded transcripts (EMvC & EB), discussed them among the team members and established the level of data saturation, based on the results of new interviews in relation to the previous findings. Thematic saturation (34) occurred after 15 interviews.

### Data analysis

The framework method for qualitative research was followed for a systematic approach of data analysis (35). This comprised the stages of transcription, familiarisation, coding, applying the framework and interpretation. All but one of the interviews were transcribed verbatim. One audio recording failed due to a technical error. Instead of being transcribed, WH summarised the conversation immediately after the interview. Familiarisation with the data took place during transcription and by reading the transcripts in detail. In parallel, the interview guide was discussed and refined by the research team. Transcripts were coded using both an inductive and deductive approach with supporting qualitative data analysis software ATLAS.ti 8 (36). Two separate researchers (WH & JL) coded the transcripts, starting with an inductive open coding phase, identifying categories and applying a code to a line or paragraph. After the first three transcripts, these open codes were deductively assigned to the categories of the TAM model (28). Applied categories were perceived utility, perceived ease of use and intention to use, including their subcategories, creating a coding scheme. When a code did not fit TAM the model, a new category was created, capturing the essence of the code. After the full research team agreed on the identified categories and codes, the final coding scheme emerged, which then was applied on all transcripts. The Standards for Reporting Qualitative Research (SRQR) were used as guideline for appropriate reporting (37).

### Patient and Public Involvement

There was no patient or public involvement in the study.

## Results

### Sample of GPs

The purposive sample of GPs contained a balance in the characteristics (Appendix 1): gender (M/F), work experience (0-10, >10 years), type of general practice (health centre: Y/N, part of care group: Y/N). The experience with referring patients to CLIs (hardly any experience/little experience/experienced) emerged during data analysis, to be clearly related with GPs' view on lifestyle interventions and potential barriers and facilitators. Therefore, the research team decided to include this characteristic as an additional sampling criterion.

### Perceptions, intentions and behaviour of GPs

The perception, intentions and behaviour of GPs regarding the implementation of CLIs in primary care could be categorized into three main themes: 1) Relevance and use of lifestyle interventions in general, 2) Relevance and use of CLIs, and 3) Barriers and facilitators to the implementation of CLIs. Each theme will be discussed below, with the corresponding sub-themes, as summarized in Table 2.

**Table 2.** Themes and subthemes in results

| Themes                                                  | Subthemes                                                                                               |
|---------------------------------------------------------|---------------------------------------------------------------------------------------------------------|
| Relevance and use of lifestyle interventions in general | GPs' role in lifestyle modification interventions<br>Perceived effectiveness of lifestyle interventions |
| Relevance and use of combined lifestyle interventions   | Awareness of CLI<br>Perceived effectiveness of CLI<br>Experiences with CLI                              |
| Barriers and facilitators to implementation of CLIs     | Barriers<br>Facilitators                                                                                |

### Relevance and use of lifestyle interventions in general

GPs' views on the relevance of lifestyle interventions and their current use in daily practice was influenced by their opinion about the role a GP should play in lifestyle support as well as the perceived effectiveness of lifestyle interventions.

#### *GPs' role in lifestyle modification interventions*

Prevention through lifestyle interventions was considered important by all GPs, although there was substantial variation on perceived relevance and the role of the GP in lifestyle interventions.

*I think it is our job (as GPs) to ensure that people become as healthy as possible, function as well as possible, but also remain as healthy as possible. - GP 2, Male*

From the interviews, two main approaches of lifestyle support by GPs emerged. The first one focused on referral of eligible patients to qualified professionals for further lifestyle coaching.

*When you want to do something with lifestyle, you often refer to the dietician or physical therapist for example. Nowadays, it's often embedded in a chronic care program, such as the one for diabetes. - GP 7, Male*

The second approach was followed by GPs taking an active role in guidance on healthy lifestyles themselves.

*I actually experiment with lifestyle support myself, for example by doing a one-hour lifestyle consultation, to discuss all kinds of lifestyle-related issues in more detail. I am busy with all kinds of projects, together with social work, physiotherapists, dieticians and lifestyle coach-like people, from which a nice network has emerged. - GP 2, Male*

One of the interviewees believed achieving a healthy lifestyle was a responsibility that primarily lied with patients themselves, without the need to provide large-scale support and coaching.

*I think the best thing is if patients take control themselves. Without the help of other care providers (besides GPs), becoming more independent and stronger and taking it into their own hands. - GP 3, Male*

Next to their own role, GPs felt that the national government plays an important role in prevention, mainly through policies and regulations promoting a healthy lifestyle, e.g. raising taxes on unhealthy food products.

*I think the government has a big role in imposing taxes and other smart things. How products are displayed in the supermarket, the locations of snack bars... instead of leaving it up to the medical care. - GP 13, Male*

GPs' own experiences with providing or referring their patients for lifestyle support appeared to have a positive effect on their judgement of this type of care provision, due to the stimulating effect of ample positive feedback from their patients and the health results that were achieved.

*You see that people can get rid of their medication, that HbA1c has gone down, that blood pressure is improving, that people are losing weight, that kind of things. That shows me that it is effective. - GP 2, Male*

### ***Perceived effectiveness of lifestyle interventions***

One of the main factors driving the judgement on lifestyle programs was the GP's perceived effectiveness of these interventions with quality of the lifestyle coaches and intensity (duration and number of sessions) playing a big role.

*It obviously depends on the intervention, how many contact moments there are for communication and weighing. Besides that, when such a program ends, are people left to themselves again or do they still have follow-up meetings regularly? Of course, we know from research that behaviour change takes time. If it is a very short intervention without any follow-up, it is not going to be effective. - GP 1, Female*

Patient's motivation also was an important prerequisite for effectiveness of lifestyle interventions. Most GPs considered it their responsibility to motivate participants, but some felt that without a certain motivation level any attempt would be useless.

*Lifestyle interventions can be extremely effective in risk reduction. However, that definitely requires patient's motivation. Unfortunately, many think it will be arranged for them if they start with something like that (CLI). Of course, that's not the case. You get information, you get advice, you get a helping hand, but in the end, you have to do it yourself. - GP 15, Female*

### **Relevance and use of combined lifestyle interventions**

Only few GPs were well aware of the recently introduced CLI-programs and almost no one had experience with referring patients to a CLI. The perceived effectiveness of CLIs varied.

#### ***Awareness of CLI***

Only few GPs appeared to be well informed on the concept of a certified coach and lifestyle groups for weight reduction for obese patients with high cardiovascular risk profile. GPs indicated that more understanding of the proposed multi-component interventions was necessary to facilitate their referral of patients to such programs.

*I need to know more about it (CLI) and have clearer and more specific information about it... I think if I know more about it, someone explains me more clearly what will be reimbursed or not, what the investment is for the patient, what happens if they drop out, then I might be able to do something with it. - GP 10, Male*

The interviews revealed that GPs had a more positive attitude towards the program when they had an unequivocal understanding for which of their patients CLI was intended, as it was not always clear which patients were eligible for participation in CLIs.

*I do have a number of patients in mind who are overweight or obese and if the CLI might be a solution for them, that would be great. - GP 7, Male*

#### ***Perceived effectiveness of CLI***

GPs believed CLIs could be effective in the prevention of chronic diseases.

*I think something like that (CLI) is much better than all those pills we prescribe. These are the things that have been proven to be good for you, if you exercise it is good for the prevention of cardiovascular disease, for diabetes, it is good for everything. - GP 9, Female*

However, they were sceptical about the added value of such interventions above and beyond the already well-established support offered by existing qualified paramedical health care professionals, such as physiotherapists, dieticians or practice nurses. GPs without prior experience with CLI felt that the introduction of a lifestyle coach might even complicate referral procedures.

*Do I believe in it (lifestyle coach)? Well, I am not convinced yet. A lifestyle coach is a new profession in healthcare. What is their background, what can they do? I think you can easily call yourself a lifestyle coach. When I will co-operate with someone, I need to have a little bit of faith in someone. I want to know that someone can actually do what is asked. - GP 4, Female*



1  
2  
3 Finally, GPs often expressed doubts on the long-term effect of CLIs, despite a potential beneficial short-  
4 term effect in behavioural change.  
5

6 *I'm always a little afraid of a temporary effect only. After 2 years, that (CLI) is stopped and then people*  
7 *can easily fall back into old behavioural patterns. That is the problem with groups, as long as they are*  
8 *together, it is going well, but I think it is very difficult to maintain the lifestyle changes afterwards. - GP*  
9 *4, Female*

### 10 **Experiences with CLI**

11 The four GPs who had gained some experience with CLIs and lifestyle coaches worked within care  
12 groups which had contracted this type of care.  
13

14 *We refer people with cardiovascular diseases to lifestyle groups and recently we have also started*  
15 *referring overweight people to the combined lifestyle intervention. - GP 15, Female*  
16

17 All of them were positive on the group sessions being part of the CLIs and were convinced of the added  
18 value of these group sessions on current lifestyle care.  
19

20 *It's nice to hear the experiences of other people, to hear those others struggle with the same problems.*  
21 *Sometimes people get to know each other, pick things up together, have each other's support. So, I think*  
22 *it is certainly not for everyone, but it is very useful for quite a lot of people. - GP 14, Female*  
23

### 24 **Barriers and facilitators to implementation of CLIs**

25 The interviews revealed several factors that may affect successful implementation of CLI.  
26

#### 27 **Barriers**

28 Most GPs indicated already providing lifestyle advice on a daily basis and therefore were not always  
29 convinced that CLIs would have an additional value.  
30

31 *In all honesty, I think prevention is always a complicated issue in general practice. We're busy with*  
32 *prevention all day long, giving lifestyle advice throughout the day. That is what I also think with this*  
33 *CLI, it is what we are already doing all the time, isn't it? What more can we offer? - GP 5, Female*  
34

35 The limited budget health insurance companies received from the government was seen as a major  
36 barrier for CLI implementation, yielding insufficient room to cover the eligible high-risk population  
37 within their practice population.  
38

39 *It (CLI) will not get off the ground, because they have deliberately limited the budget. - GP 13, Male*  
40

41 Lack of convincing scientific evidence on the effectiveness of the CLI for the patient was also mentioned  
42 as a barrier to implementation. Therefore, GPs proposed to test CLIs in a trial first, before the  
43 government would take a final decision on large-scale funding of such programs in the health care  
44 landscape. Finally, lack of visibility of CLI-offering organisations in the close vicinity of the practice,  
45 as well as shortage of certified lifestyle coaches were mentioned as barriers to make use of CLIs.  
46

#### 47 **Facilitators**

48 GPs indicated that successful implementation of CLIs would mainly depend on long-term financial and  
49 organisational support.  
50

51 *I hope that when health insurance companies say we will reimburse it, they will do so for at least 5 years*  
52 *or so. That there is the opportunity to build something and have success with it. Because I think, it takes*  
53 *around 2-3 years before such a new measure is picked up a bit. - GP 1, Female*  
54

55 Other prerequisites for a successful program were adequate, centralised coordination of the  
56 implementation, and continuous monitoring and evaluation of the program with key stakeholders,  
57 including GPs.  
58

59 *We have a regional primary care organization for the entire region, so to speak. Almost all general*  
60 *practitioners are affiliated with it. They are responsible for the organisation of chronic care, people*

1  
2  
3 *with cardiovascular disease, diabetes and COPD for example. This (CLIs) is actually part of it, so the*  
4 *organization will pick it up and inform us (GPs) on it. - GP 12, Female*  
5

6 This preference was emphasised by the GPs who had already worked with CLIs.

7 *You need someone who takes care of the organisation. A GP cooperative is quite an appropriate*  
8 *organisation for that, I think. Someone who examines: do we have lifestyle coaches in the region, how*  
9 *are we going to get more, how are we going to arrange referrals from general practitioners to lifestyle*  
10 *coaches and how do we ensure that they become known to general practitioners? - GP 14, Female*  
11  
12  
13  
14  
15  
16  
17  
18  
19  
20  
21  
22  
23  
24  
25  
26  
27  
28  
29  
30  
31  
32  
33  
34  
35  
36  
37  
38  
39

## 40 **Discussion**

### 41 **Main findings**

42 In this study, we explored GPs' views on the implementation of combined lifestyle interventions (CLIs)  
43 in primary care, from an early moment of the introduction of the reimbursement policy in the  
44 Netherlands. Most GPs acknowledge the relevance and importance of lifestyle support across a broad  
45 spectrum of patients. GPs' views on lifestyle support programmes were influenced by their belief in its  
46 effectiveness and their perceived professional role in preventive care. In addition, this appeared to be  
47 closely related to the way they put personal lifestyle guidance into practice, or to referrals to health care  
48 professionals to deliver such care, including CLI coaches. According to GPs, the implementation of  
49 CLIs fell short on several levels. First, there was limited information provided about the content of the  
50 CLIs, and its effectiveness compared to existing lifestyle support. GPs were not always convinced of  
51 the added value of such programs above and beyond the existing lifestyle support already offered by  
52 paramedical professionals (e.g., physiotherapists, dieticians). Second, the amount of available budget  
53 for CLI reimbursement was perceived to be insufficient to cover the costs of the entire group of eligible  
54 patients. The CLI reimbursement policy was also perceived as a potential threat to other, already  
55 established, health care professions and lifestyle interventions. Third, limited capacity of CLI coaches  
56 in the proximity of the GP practice, as well as a lack of coordination of the implementation of CLI  
57 programmes was regarded as a potential barrier to their adoption. According to the GPs, a well-  
58 coordinated introduction of CLIs for GP practices would facilitate early adoption and implementation.  
59  
60

1  
2  
3 GPs also indicated that continuous monitoring and evaluation of the CLI programme should be  
4 available, to create an evidence base on the long-term effectiveness. This is needed to justify and  
5 facilitate the allocation of sufficient budget for reimbursement of CLIs for all potentially eligible  
6 participants.  
7

### 8 **Related work**

9 Below we discuss how the main findings relate to earlier work in this domain.

10 Previous implementation research has shown that GPs have different perceptions on whether lifestyle  
11 support is part of their core tasks (38–40). This is in line with our findings, showing a broad range of  
12 preferred strategies, from provision of personalised, active lifestyle support to referral of patients to  
13 other health care professionals. A crucial prerequisite for adopting preventive interventions, including  
14 lifestyle guidance, appears GPs' belief in their effectiveness (38,41). Conversely, the perceived lack of  
15 scientific evidence for their (long-term) effectiveness, or belief that health care authorities are better  
16 equipped to provide preventive care withholds GPs to implement interventions in practice (21,38,40,42–  
17 45).

18  
19 Our study demonstrated a lack of awareness among GPs on the CLI and the reimbursement policy.  
20 Sufficient awareness and knowledge among GPs on content and effectiveness of new programs appear  
21 to be important requirements for a positive attitude towards healthcare innovations (38,46–48). The  
22 visibility and sustained provision of behavioural lifestyle interventions is an additional factor that affects  
23 GPs' willingness to utilize them in their daily care (49). This appears to be strengthened by GPs' mention  
24 of their unfamiliarity with the CLI-program's content and lifestyle coaches' new and unknown role as  
25 important barriers to its implementation. There is some evidence that education and early involvement  
26 of key stakeholders (e.g., those needed to implement the innovation) increase the adoption of healthcare  
27 innovations (43,46,50–53). Facilitating increased awareness and knowledge on CLIs among GPs  
28 through actively involving GPs in an early phase could therefore contribute to their overall  
29 implementation.

30  
31 Other factors that may impede implementation of behavioural lifestyle support programs are high  
32 workload, lack of time and lack of finances (38–40,43,46). In our study, burden of work or time  
33 constraints were hardly mentioned, possibly since the intervention mostly lay outside GPs' care  
34 provision. Nevertheless, they did raise concerns about potential limitations in funding and professional  
35 resources, which have been shown important factors for successful adoption (50,54). On the other hand,  
36 it was emphasized that coordination at the GP cooperative level was a clear potential facilitator for early  
37 adoption and implementation of the CLI.  
38

### 39 **Strengths and limitations**

40  
41 The timing of this study was at an opportune moment, as an intervention for primary care became  
42 available in real life, in order to observe to what extent a new policy was being leveraged. This made it  
43 possible to explore and understand facilitators and barriers for adoption in an early stage of  
44 implementation. These first experiences and expectations can inform the guidance of the further  
45 development of its implementation. However, this may also be a limitation, as overall perceptions of the  
46 GPs may have changed over time due to more experience and more public discussion related to the  
47 CLIs. Another limitation of our study is that it focused on GP's perspectives only, while the views of  
48 other stakeholders, including patients, health insurance companies or lifestyle coaches, could have led  
49 to more comprehensive insights on the dynamics of CLI implementation.  
50

### 51 **Conclusion and implications**

52  
53 This study showed that the early adoption and implementation of CLIs in primary care in the Netherlands  
54 is challenging. Although GPs acknowledged the importance of lifestyle support in general, the  
55 awareness of CLIs was still limited. At the same time, doubts about their effectiveness for participants,  
56 their added value on top of already existing lifestyle support interventions and the lack of resources for  
57 GPs to realise the CLI in practice, hindered their adoption. Policy makers, together with the developers  
58 of the CLIs, should pay attention to the adequate promotion of new CLIs and the early involvement of  
59 key stakeholders in the regional implementation. In addition, the available financial and professional  
60 resources to realise the CLI in practice for the entire group of potentially eligible people and coordination  
at a GP cooperative level must also be considered. Finally, attention should also be paid to the alignment

1  
2  
3 with existing programs for lifestyle support and preventive services in primary care and the feedback to  
4 the GPs on achieved results by participants. Proper monitoring and evaluation of the implementation of  
5 CLIs and their effectiveness may elucidate opportunities for improvement.  
6  
7  
8  
9  
10  
11  
12  
13  
14  
15  
16  
17  
18  
19  
20  
21  
22  
23  
24  
25  
26  
27  
28  
29  
30  
31  
32  
33  
34  
35

### 36 **Acknowledgments**

37 The authors gratefully acknowledge all the GPs who shared their experiences and insights in order that  
38 we could understand to what extent a new policy regarding the CLIs in the Netherlands was being  
39 leveraged.  
40

### 41 **Author contributions**

- 42 • WH designed the study in collaboration with the research team, created the interview guide, led the  
43 qualitative data collection and conducted and transcribed the interviews, then coded all transcripts  
44 and has analysed the data in collaboration with the research team.
- 45 • JL assisted in the study design, recruited participants, finetuned the interview guide, coded  
46 transcripts and contributed to the interpretation of data and editing of the article.
- 47 • EMvC assisted in the study design, recruited participants, coded transcripts and contributed to the  
48 interpretation of data and editing of the article.
- 49 • EB assisted in the study design, recruited participants, coded transcripts and contributed to the  
50 interpretation of data and editing of the article.
- 51 • All authors provided feedback on the manuscript and approval to the publishing of this manuscript.  
52  
53  
54

### 55 **Funding statement**

56 Funding for this qualitative research has been provided by the Department of Public & Occupational  
57 health of Amsterdam UMC and Philips Research Eindhoven.  
58  
59  
60

### Competing interests

The authors have no competing interests to declare.

### Data availability statement

The data is stored in a secure environment of the Amsterdam UMC. If necessary, data can be requested from E.J.A.J. Beune (Department of Public and Occupational Health, Amsterdam UMC location AMC, Meibergdreef 15, 1105 AZ Amsterdam, [e.j.beune@amc.uva.nl](mailto:e.j.beune@amc.uva.nl)).

## References

1. Barnett J, Vasileiou K, Djemil F, Brooks L, Young T. Understanding innovators' experiences of barriers and facilitators in implementation and diffusion of healthcare service innovations: a qualitative study. *BMC Health Serv Res* [Internet]. 2011;11(1):342. Available from: <https://doi.org/10.1186/1472-6963-11-342>
2. Berwick DM. Disseminating Innovations in Health Care. *JAMA* [Internet]. 2003 Apr 16;289(15):1969–75. Available from: <https://doi.org/10.1001/jama.289.15.1969>
3. Michie S, Johnston M, Abraham C, Lawton R, Parker D, Walker A. Making psychological theory useful for implementing evidence based practice: A consensus approach. *Qual Saf Heal Care*. 2005;14(1):26–33.
4. Fleuren MAH, Paulussen TGWM, Dommelen P, Buuren S Van. Towards a measurement instrument for determinants of innovations. *Int J Qual Heal Care*. 2014;26(5):501–10.
5. Fleuren M, Wiefferink K, Paulussen T. Determinants of innovation within health care organizations. *Int J Qual Heal Care*. 2004;16(2):107–23.
6. Teuscher D, Bukman AJ, Baak MA Van, Feskens EJM, Renes RJ, Meershoek A. A lifestyle intervention study targeting individuals with low socioeconomic status of different ethnic origins : important aspects for successful implementation. 2018;1–10.
7. Fischer F, Lange K, Klose K, Greiner W, Kraemer A. Barriers and Strategies in Guideline Implementation—A Scoping Review. *Healthcare*. 2016;4(3):36.
8. Peters DH, Adam T, Alonge O. Implementation research : what it is and how to do it. 2013;6753(November):1–7. Available from: <http://dx.doi.org/doi:10.1136/bmj.f6753>
9. Rijksinstituut voor Volksgezondheid en Milieu (RIVM). Factsheet gecombineerde leefstijl interventie.
10. Huis voor Beweging. Beschrijving interventie BeweegKuur. RIVM. 2015;
11. Expertisecentrum Leefstijlinterventies. Beschrijving interventie Cool. RIVM. 2015;
12. GGD Noord- en Oost-Gelderland. Beschrijving interventie SLIMMER. RIVM. 2015;

13. Berendsen BAJ, Hendriks MRC, Rutten GM, Kremers SPJ, Savelberg HHCM, Schaper NC. The added value of frequent physical activity group sessions in a combined lifestyle intervention: A cluster randomised trial in primary care. *Prev Med reports*. 2020 Dec;20:101204.
14. Gremeaux V, Drigny J, Nigam A, Juneau M, Guilbeault V, Latour E, et al. Long-term lifestyle intervention with optimized high-intensity interval training improves body composition, cardiometabolic risk, and exercise parameters in patients with abdominal obesity. *Am J Phys Med Rehabil*. 2012 Nov;91(11):941–50.
15. Peiris CL, Taylor NF, Hull S, Anderson A, Belski R, Furlanos S, et al. A Group Lifestyle Intervention Program Is Associated with Reduced Emergency Department Presentations for People with Metabolic Syndrome: A Retrospective Case-Control Study. *Metab Syndr Relat Disord*. 2018;16(2):110–6.
16. Hardcastle S, Taylor A, Bailey M, Castle R. A randomised controlled trial on the effectiveness of a primary health care based counselling intervention on physical activity, diet and CHD risk factors. *Patient Educ Couns*. 2008 Jan;70(1):31–9.
17. Seidell JC, Halberstadt J. The global burden of obesity and the challenges of prevention. *Ann Nutr Metab*. 2015;66(suppl 2):7–12.
18. World Health Organization. 10 Facts on obesity. Vol. October. 2017.
19. World Health Organization. Global Health Expenditure Database. 2016.
20. Lee IM, Shiroma EJ, Lobelo F, Puska P, Blair SN, Katzmarzyk PT, et al. Effect of physical inactivity on major non-communicable diseases worldwide: An analysis of burden of disease and life expectancy. *Lancet*. 2012;380(9838):219–29.
21. Mai K, Brachs M, Leupelt V, Jumpertz-von Schwartzberg R, Maurer L, Grütters-Kieslich A, et al. Effects of a combined dietary, exercise and behavioral intervention and sympathetic system on body weight maintenance after intended weight loss: Results of a randomized controlled trial. *Metabolism*. 2018;83:60–7.
22. König D, Hörmann J, Predel H-G, Berg A. A 12-Month Lifestyle Intervention Program Improves Body Composition and Reduces the Prevalence of Prediabetes in Obese Patients. *Obes Facts*. 2018;11(5):393–9.
23. Hassan Y, Head V, Jacob D, Bachmann MO, Diu S, Ford J. Lifestyle interventions for weight loss in adults with severe obesity: a systematic review. *Clin Obes*. 2016;6(6):395–403.
24. Duijzer G, Haveman-Nies A, Jansen SC, Ter Beek J, Van Bruggen R, Willink MGJ, et al. Effect and maintenance of the SLIMMER diabetes prevention lifestyle intervention in Dutch primary healthcare: A randomised controlled trial. *Nutr Diabetes*. 2017;7(5).
25. Roumen C, Blaak EE, Corpeleijn E. Lifestyle intervention for prevention of diabetes: Determinants of success for future implementation. *Nutr Rev*. 2009;67(3):132–46.
26. Schutte BAM, Haveman-Nies A, Preller L. One-year results of the Beweeg-Kuur lifestyle intervention implemented in Dutch primary healthcare settings. *Biomed Res Int*. 2015;
27. Zhang Y, Pan XF, Chen J, Xia L, Cao A, Zhang Y, et al. Combined lifestyle factors and risk of incident type 2 diabetes and prognosis among individuals with type 2 diabetes: a systematic review and meta-analysis of prospective cohort studies. *Diabetologia*. 2020;63(1):21–33.
28. Venkatesh V, Davis FD. A Theoretical Extension of the Technology Acceptance Model: Four Longitudinal Field Studies. *Manage Sci*. 2003;46(2):186–204.
29. Davis FD. Perceived Usefulness, Perceived Ease of Use, and User Acceptance of Information Technology. *MIS Q*. 1989;13(0):319–40.
30. Davis FD, Bagozzi RP, Warshaw PR. User Acceptance of Computer Technology: A Comparison of Two Theoretical Models. *Manage Sci*. 2008;35(8):982–1003.
31. Holden RJ, Karsh B-T. The technology acceptance model: its past and its future in health care. *J Biomed Inform*. 2010;43(1):159–72.
32. Tikkanen R et al. International Health Care System Profiles - Netherlands. Vol. 6, *Journal of the American Board of Family Medicine*. 2020.
33. Independence in Scientific Research: Research Code AMC–VUmc. 2019.
34. Saunders B, Sim J, Kingstone T, Baker S, Waterfield J, Bartlam B, et al. Saturation in qualitative research: exploring its conceptualization and operationalization. *Qual Quant*. 2018;52(4):1893–907.
35. Gale NK, Heath G, Cameron E, Rashid S, Redwood S. Using the framework method for the analysis of qualitative data in multi-disciplinary health research. *BMC Med Res Methodol*. 2013;13:117.
36. ATLAS.ti 8. p. <https://atlasti.com/>.
37. O'Brien BC, Harris IB, Beckman TJ, Reed DA, Cook DA. Standards for Reporting Qualitative Research: A Synthesis of Recommendations. *Acad Med [Internet]*. 2014;89(9). Available from: [https://journals.lww.com/academicmedicine/Fulltext/2014/09000/Standards\\_for\\_Reporting\\_Qualitative\\_Research\\_\\_A.21.aspx](https://journals.lww.com/academicmedicine/Fulltext/2014/09000/Standards_for_Reporting_Qualitative_Research__A.21.aspx)
38. Geense WW, Glind IM Van De, Visscher TLS, Achterberg T Van. Barriers, facilitators and attitudes

- 1  
2  
3 influencing health promotion activities in. *BMC Fam Pract.* 2013;14(20).
- 4 39. Ampt AJ, Amoroso C, Harris MF, McKenzie SH, Rose VK, Taggart JR. Attitudes, norms and controls  
5 influencing lifestyle risk factor management in general practice. *BMC Fam Pract.* 2009;10:1–8.
- 6 40. Rubio-Valera M, Pons-Vigués M, Martínez-Andrés M, Moreno-Peral P, Berenguera A, Fernández A.  
7 Barriers and facilitators for the implementation of primary prevention and health promotion activities in  
8 primary care: A synthesis through meta-ethnography. *PLoS One.* 2014;9(2).
- 9 41. Jansink R, Braspenning J, van der Weijden T, Elwyn G, Grol R. Primary care nurses struggle with  
10 lifestyle counseling in diabetes care: a qualitative analysis. *BMC Fam Pract.* 2010 May;11:41.
- 11 42. Sebo P, Maisonneuve H, Fournier J-P, Senn N, Haller DM. General practitioners' views and preferences  
12 about quality improvement feedback in preventive care: a cross-sectional study in Switzerland and  
13 France. *Implement Sci.* 2017;12(1):95.
- 14 43. Brotonsc C, Björkelund C, Bulc M, Ciurana R, Godycki-Cwirko M, Jurgova E, et al. Prevention and  
15 health promotion in clinical practice: The views of general practitioners in Europe. *Prev Med (Baltim).*  
16 2005;40(5):595–601.
- 17 44. Verberne LDM, Hendriks MRC, Rutten GM, Spronk I, Savelberg HHCM, Veenhof C, et al. Evaluation  
18 of a combined lifestyle intervention for overweight and obese patients in primary health care: A quasi-  
19 experimental design. *Fam Pract.* 2016;33(6):671–7.
- 20 45. Haw JS, Galaviz KI, Straus AN, Kowalski AJ, Magee MJ, Weber MB, et al. Long-term sustainability of  
21 diabetes prevention approaches: A systematic review and meta-analysis of randomized clinical trials.  
22 *JAMA Intern Med.* 2017;177(12):1808–17.
- 23 46. Molema CCM, Schegget S, Schuit AJ, Goor LAM Van De. Perceived barriers and facilitators of the  
24 implementation of a combined lifestyle intervention with a financial incentive for chronically ill patients.  
25 2019;1–11.
- 26 47. Alayli A, Krebs F, Lorenz L, Nawabi F, Bau A, Lück I, et al. Evaluation of a computer-assisted multi-  
27 professional intervention to address lifestyle-related risk factors for overweight and obesity in expecting  
28 mothers and their infants : protocol for an effectiveness- implementation hybrid study. 2020;1–13.
- 29 48. Helmink JHM, Kremers SPJ, Van Boekel LC, Van Brussel-Visser FN, De Vries NK. Factors  
30 determining the motivation of primary health care professionals to implement and continue the  
31 “Bewegkuur” lifestyle intervention programme. *J Eval Clin Pract.* 2012;18(3):682–8.
- 32 49. Cohen Rodrigues TR, de Buissonjé DR, Keesman M, Reijnders T, van der Geer JE, Janssen VR, et al.  
33 Facilitators of and Barriers to Lifestyle Support and eHealth Solutions: Interview Study Among Health  
34 Care Professionals Working in Cardiac Care. *J Med Internet Res.* 2021;23(10):e25646.
- 35 50. Grol R, Grimshaw J. From best evidence to best practice : effective implementation of change in patients  
36 ' care. *Res into Pract.* 2003;362:1225–30.
- 37 51. Beune EJAJ, Haafkens JA, Bindels PJE. Barriers and enablers in the implementation of a provider-based  
38 intervention to stimulate culturally appropriate hypertension education. *Patient Educ Couns.*  
39 2011;82(1):74–80.
- 40 52. Kingma AEC, van Stel HF, Oudega R, Moons KGM, Geersing GJ. Multi-faceted implementation  
41 strategy to increase use of a clinical guideline for the diagnosis of deep venous thrombosis in primary  
42 care. *Fam Pract.* 2017;34(4):446–51.
- 43 53. Van Rinsum C, Gerards S, Rutten G, Johannesma M, Van De Goor I, Kremers S. The implementation of  
44 the coaching on lifestyle (CooL) intervention: Lessons learnt. *BMC Health Serv Res.* 2019;19(1):1–12.
- 45 54. Laws RA, Kemp LA, Harris MF, Davies GP, Williams AM, Eames-Brown R. An exploration of how  
46 clinician attitudes and beliefs influence the implementation of lifestyle risk factor management in  
47 primary healthcare: A grounded theory study. *Implement Sci.* 2009;4(1):1–15.
- 48  
49  
50  
51  
52  
53  
54  
55  
56  
57  
58  
59  
60

1  
2  
3  
4  
5  
6  
7  
8  
9  
10  
11  
12  
13  
14  
15  
16  
17  
18  
19  
20  
21  
22  
23  
24  
25  
26  
27  
28  
29  
30  
31  
32  
33  
34  
35  
36  
37  
38  
39  
40  
41  
42  
43  
44  
45  
46  
47  
48  
49  
50  
51  
52  
53  
54  
55  
56  
57  
58  
59  
60

For peer review only



## Appendix 1

### GP characteristics

| Characteristics                               | N  | %   |
|-----------------------------------------------|----|-----|
| Gender                                        |    |     |
| Male                                          | 6  | 40% |
| Female                                        | 9  | 60% |
| Age                                           |    |     |
| 30-40                                         | 6  | 40% |
| 40-50                                         | 5  | 33% |
| 50-65                                         | 4  | 27% |
| Years of working experience                   |    |     |
| 0-10                                          | 8  | 53% |
| >10                                           | 7  | 47% |
| General practice in health centre             |    |     |
| Yes                                           | 7  | 47% |
| No                                            | 8  | 53% |
| Practice part of a care group                 |    |     |
| Yes                                           | 7  | 47% |
| No                                            | 8  | 53% |
| Socioeconomic status of practice's population |    |     |
| Low                                           | 6  | 40% |
| Middle                                        | 6  | 40% |
| High                                          | 3  | 20% |
| Experience with CLIs                          |    |     |
| No experience                                 | 11 | 73% |
| Little experience                             | 2  | 13% |
| Experienced                                   | 2  | 13% |

## Standards for Reporting Qualitative Research (SRQR)

O'Brien B.C., Harris, I.B., Beckman, T.J., Reed, D.A., & Cook, D.A. (2014). Standards for reporting qualitative research: a synthesis of recommendations. *Academic Medicine*, 89(9), 1245-1251.

| No.                       | Topic                                       | Item                                                                                                                                                                                                                                                                                                                                     | Page |
|---------------------------|---------------------------------------------|------------------------------------------------------------------------------------------------------------------------------------------------------------------------------------------------------------------------------------------------------------------------------------------------------------------------------------------|------|
| <b>Title and abstract</b> |                                             |                                                                                                                                                                                                                                                                                                                                          |      |
| S1                        | Title                                       | Concise description of the nature and topic of the study identifying the study as qualitative or indicating the approach (e.g., ethnography, grounded theory) or data collection methods (e.g., interview, focus group) is recommended                                                                                                   | 1    |
| S2                        | Abstract                                    | Summary of key elements of the study using the abstract format of the intended publication; typically includes objective, methods, results, and conclusions                                                                                                                                                                              | 2    |
| <b>Introduction</b>       |                                             |                                                                                                                                                                                                                                                                                                                                          |      |
| S3                        | Problem formulation                         | Description and significance of the problem/phenomenon studied; review of relevant theory and empirical work; problem statement                                                                                                                                                                                                          | 3    |
| S4                        | Purpose or research question                | Purpose of the study and specific objectives or questions                                                                                                                                                                                                                                                                                | 3    |
| <b>Methods</b>            |                                             |                                                                                                                                                                                                                                                                                                                                          |      |
| S5                        | Qualitative approach and research paradigm  | Qualitative approach (e.g., ethnography, grounded theory, case study, phenomenology, narrative research) and guiding theory if appropriate; identifying the research paradigm (e.g., positivist, constructivist/interpretivist) is also recommended                                                                                      | 4    |
| S6                        | Researcher characteristics and reflexivity  | Researchers' characteristics that may influence the research, including personal attributes, qualifications/experience, relationship with participants, assumptions, or presuppositions; potential or actual interaction between researchers' characteristics and the research questions, approach, methods, results, or transferability | 4    |
| S7                        | Context                                     | Setting/site and salient contextual factors; rationale <sup>a</sup>                                                                                                                                                                                                                                                                      | 4    |
| S8                        | Sampling strategy                           | How and why research participants, documents, or events were selected; criteria for deciding when no further sampling was necessary (e.g., sampling saturation); rationale <sup>a</sup>                                                                                                                                                  | 4    |
| S9                        | Ethical issues pertaining to human subjects | Documentation of approval by an appropriate ethics review board and participant consent, or explanation for lack thereof; other confidentiality and data security issues                                                                                                                                                                 | 4    |
| S10                       | Data collection methods                     | Types of data collected; details of data collection procedures including (as appropriate) start and stop                                                                                                                                                                                                                                 | 4-5  |

|                                                                                                  |                                                                                                                                                                                                                                                                                                       |       |
|--------------------------------------------------------------------------------------------------|-------------------------------------------------------------------------------------------------------------------------------------------------------------------------------------------------------------------------------------------------------------------------------------------------------|-------|
|                                                                                                  | dates of data collection and analysis, iterative process, triangulation of sources/methods, and modification of procedures in response to evolving study findings; rationale <sup>a</sup>                                                                                                             |       |
| S11 Data collection instruments and technologies                                                 | Description of instruments (e.g., interview guides, questionnaires) and devices (e.g., audio recorders) used for data collection; if/how the instrument(s) changed over the course of the study                                                                                                       | 4-5   |
| S12 Units of study                                                                               | Number and relevant characteristics of participants, documents, or events included in the study; level of participation (could be reported in results)                                                                                                                                                | 4     |
| S13 Data processing                                                                              | Methods for processing data prior to and during analysis, including transcription, data entry, data management and security, verification of data integrity, data coding, and anonymization/deidentification of excerpts                                                                              | 5     |
| S14 Data analysis                                                                                | Process by which inferences, themes, etc., were identified and developed, including researchers involved in data analysis; usually references a specific paradigm or approach; rationale <sup>a</sup>                                                                                                 | 5     |
| S15 Techniques to enhance trustworthiness                                                        | Techniques to enhance trustworthiness and credibility of data analysis (e.g., member checking, audit trail, triangulation); rationale <sup>a</sup>                                                                                                                                                    | 4-5   |
| <b>Results/Findings</b>                                                                          |                                                                                                                                                                                                                                                                                                       |       |
| S16 Synthesis and interpretation                                                                 | Main findings (e.g., interpretations, inferences, and themes); might include development of a theory or model, or integration with prior research or theory                                                                                                                                           | 10    |
| S17 Links to empirical data                                                                      | Evidence (e.g., quotes, field notes, text excerpts, photographs) to substantiate analytic findings                                                                                                                                                                                                    | 8-9   |
| <b>Discussion</b>                                                                                |                                                                                                                                                                                                                                                                                                       |       |
| S18 Integration with prior work, implications, transferability, and contribution(s) to the field | Short summary of main findings; explanation of how findings and conclusions connect to, support, elaborate on, or challenge conclusions of earlier scholarship; discussion of scope of application/generalizability; identification of unique contribution(s) to scholarship in a discipline or field | 10    |
| S19 Limitations                                                                                  | Trustworthiness and limitations of findings                                                                                                                                                                                                                                                           | 10-11 |
| <b>Other</b>                                                                                     |                                                                                                                                                                                                                                                                                                       |       |
| S20 Conflicts of interest                                                                        | Potential sources of influence or perceived influence on study conduct and conclusions; how these were managed                                                                                                                                                                                        | 12    |
| S21 Funding                                                                                      | Sources of funding and other support; role of funders in data collection, interpretation, and reporting                                                                                                                                                                                               | 12    |

<sup>a</sup>The rationale should briefly discuss the justification for choosing that theory, approach, method, or technique rather than other options available, the assumptions and limitations implicit in those choices, and how those choices influence study conclusions and transferability. As appropriate, the rationale for several items might be discussed together.

# BMJ Open

## GPs' views on the implementation of combined lifestyle interventions in primary care in the Netherlands: a qualitative study.

|                                 |                                                                                                                                                                                                                                                                                                                                                                                                                                                                                                                                                                              |
|---------------------------------|------------------------------------------------------------------------------------------------------------------------------------------------------------------------------------------------------------------------------------------------------------------------------------------------------------------------------------------------------------------------------------------------------------------------------------------------------------------------------------------------------------------------------------------------------------------------------|
| Journal:                        | <i>BMJ Open</i>                                                                                                                                                                                                                                                                                                                                                                                                                                                                                                                                                              |
| Manuscript ID                   | bmjopen-2021-056451.R2                                                                                                                                                                                                                                                                                                                                                                                                                                                                                                                                                       |
| Article Type:                   | Original research                                                                                                                                                                                                                                                                                                                                                                                                                                                                                                                                                            |
| Date Submitted by the Author:   | 24-Dec-2021                                                                                                                                                                                                                                                                                                                                                                                                                                                                                                                                                                  |
| Complete List of Authors:       | van der Heiden, W.; Philips Research, Department of Digital Engagement, Cognition and Behavior; Amsterdam Public Health Research Institute, Department of Public & Occupational Health<br>Lacroix, J.P.W.; Philips Research, Department of Digital Engagement, Cognition and Behavior<br>Moll van Charante, Eric P; Amsterdam UMC Locatie AMC, Department of General Practice; Amsterdam Public Health Research Institute, Department of Public & Occupational Health<br>Beune, Erik; Amsterdam Public Health Research Institute, Department of Public & Occupational Health |
| <b>Primary Subject Heading</b>: | General practice / Family practice                                                                                                                                                                                                                                                                                                                                                                                                                                                                                                                                           |
| Secondary Subject Heading:      | Public health, Qualitative research, General practice / Family practice                                                                                                                                                                                                                                                                                                                                                                                                                                                                                                      |
| Keywords:                       | PRIMARY CARE, PREVENTIVE MEDICINE, PUBLIC HEALTH, QUALITATIVE RESEARCH                                                                                                                                                                                                                                                                                                                                                                                                                                                                                                       |
|                                 |                                                                                                                                                                                                                                                                                                                                                                                                                                                                                                                                                                              |

SCHOLARONE™  
Manuscripts



I, the Submitting Author has the right to grant and does grant on behalf of all authors of the Work (as defined in the below author licence), an exclusive licence and/or a non-exclusive licence for contributions from authors who are: i) UK Crown employees; ii) where BMJ has agreed a CC-BY licence shall apply, and/or iii) in accordance with the terms applicable for US Federal Government officers or employees acting as part of their official duties; on a worldwide, perpetual, irrevocable, royalty-free basis to BMJ Publishing Group Ltd ("BMJ") its licensees and where the relevant Journal is co-owned by BMJ to the co-owners of the Journal, to publish the Work in this journal and any other BMJ products and to exploit all rights, as set out in our [licence](#).

The Submitting Author accepts and understands that any supply made under these terms is made by BMJ to the Submitting Author unless you are acting as an employee on behalf of your employer or a postgraduate student of an affiliated institution which is paying any applicable article publishing charge ("APC") for Open Access articles. Where the Submitting Author wishes to make the Work available on an Open Access basis (and intends to pay the relevant APC), the terms of reuse of such Open Access shall be governed by a Creative Commons licence – details of these licences and which [Creative Commons](#) licence will apply to this Work are set out in our licence referred to above.

Other than as permitted in any relevant BMJ Author's Self Archiving Policies, I confirm this Work has not been accepted for publication elsewhere, is not being considered for publication elsewhere and does not duplicate material already published. I confirm all authors consent to publication of this Work and authorise the granting of this licence.

# GPs' views on the implementation of combined lifestyle interventions in primary care in the Netherlands: a qualitative study.

W. van der Heiden<sup>1,2</sup>, J.P.W. Lacroix<sup>2</sup>, E.P. Moll van Charante<sup>1,3</sup>, E.J.A.J. Beune<sup>1</sup>

<sup>1</sup> Department of Public & Occupational Health, Amsterdam UMC, University of Amsterdam, Amsterdam, Amsterdam Public Health Research Institute, Amsterdam, the Netherlands.

<sup>2</sup> Department of Digital Engagement, Cognition and Behavior, Philips Research, Eindhoven, the Netherlands.

<sup>3</sup> Department of General Practice, Amsterdam UMC, University of Amsterdam, Amsterdam, the Netherlands.

## For correspondence:

E.J.A.J. Beune

Department of Public & Occupational Health

Amsterdam UMC, University of Amsterdam

Meibergdreef 9

1105 AZ Amsterdam

The Netherlands

Tel: +31650063324

E-mail: [e.j.beune@amsterdamumc.nl](mailto:e.j.beune@amsterdamumc.nl)

## Word count:

4353 words

## Abstract

### Objectives

Prevention and lifestyle support are emerging topics in general practice. Healthcare insurance companies reimburse combined lifestyle interventions (CLIs) in the Netherlands since January 2019. CLIs support people with overweight (BMI 25-30) or obesity (BMI >30) to reduce weight in peer groups. General practitioners (GPs) are key in the successful implementation of lifestyle interventions in primary care. This study explored GPs' experiences and views on the implementation of CLIs to identify barriers and facilitators to the successful implementation in primary care.

### Design

Qualitative study using semi-structured interviews. Content analysis consisted of thematic coding and mapping a first stage of predefined- and second stage of iterative evolving set of themes.

### Setting

GPs were interviewed in a variety of primary care practices between February and April 2019.

### Participants

Fifteen GPs were purposively recruited for semi-structured interviews through snowballing.

### Results

Experiences with lifestyle support among GPs ranged from referring patients to other healthcare professionals to taking a proactive role in lifestyle support themselves. Whether or not GPs took an active role in lifestyle support was related to their belief in the effect of lifestyle interventions. Overall, GPs had little experience with CLI in every day practice. Perceived barriers were a lack of availability of CLIs in the region and the potential lack of added value of CLIs on top of existing lifestyle support. Perceived facilitators were coordination of care provision by GP cooperatives and monitoring of the CLI implementation and their results. Reimbursement of CLIs without any costs for participants enabled application.

### Conclusion

The importance of lifestyle interventions in primary care was acknowledged by all GPs, but they differed in their level of experience with providing lifestyle support and awareness of CLIs. Successful integration of CLIs with primary care requires a solid promotion, a well-coordinated implementation strategy and structural evaluation of long-term effectiveness.

### Strengths and limitations

- Qualitative analysis of the first experiences and expectations of healthcare interventions at an early stage can provide valuable information on barriers and facilitators to implementation.
- This is the first study to explore how general practice initially responded to a new reimbursement policy regarding the combined lifestyle intervention (CLI) in the Netherlands.
- Interviews took place in a relatively early phase after the reimbursement policy started which allowed us to study initial responses to the introduction of the policy, even though overall perceptions of the GPs may have changed over time due to more experience and more public discussion related to the CLIs.
- Only GPs were interviewed and the study results may therefore not be generalisable to perspectives of other health care workers or patients.

### Keywords

Implementation, healthcare, primary care, lifestyle support, combined lifestyle intervention, general practitioner

## Introduction

1  
2  
3 Implementation of innovations in healthcare is often challenging (1). Even when evidence for a new  
4 intervention is present, the implementation takes years to be implemented (2). Implementation  
5 researchers have reported several factors that may positively or negatively influence implementation of  
6 innovations in healthcare. These factors can be divided into a number of domains: characteristics of the  
7 innovation itself, the organisation, the socio-political context, the available resources and the adopting  
8 individual (3–5). Moreover, successful implementation largely depends on the commitment and support  
9 of involved healthcare professionals (6,7). More insight into factors influencing the process of  
10 implementation can be achieved by studying specific implementation cases (8).

11  
12 Since January 2019, healthcare insurances in de Netherlands have started to reimburse combined  
13 lifestyle interventions (CLIs) for people with overweight or obesity. The CLI is reimbursed from basic  
14 health insurance when people have a body mass index (BMI) of: 1) 25-30 and have an increased risk of  
15 cardiovascular disease or type 2 diabetes, or 2) 30 or above (9). CLIs are multicomponent interventions,  
16 which consists of interactive sessions with care professionals (e.g., a lifestyle coach, practice nurse or a  
17 paramedic). The programme is tailored to the personal needs of the participants and includes group  
18 sessions to educate participants on certain topics, share experiences and provide support (10–12).  
19 Participants receive coaching on physical activity and healthy nutrition to achieve weight reduction  
20 (13,14). The intervention takes two years, because previous research has shown that a shorter  
21 intervention is often ineffective (15,16). While in the first year, much emphasis is on guided activities,  
22 including exercise, education and sharing experiences, the second year focusses more on self-  
23 management and sustaining lifestyle changes. Lifestyle coaches, trained at a certified educational  
24 institute, are accredited to deliver CLIs to patients referred by GPs.

25  
26 General practitioners (GPs) are increasingly confronted with people with unhealthy weight in their daily  
27 practice, with approximately a quarter of the world population being overweight and one third of them  
28 being obese (17). Unhealthy weight is a major driver for chronic conditions such as diabetes and  
29 cardiovascular diseases (18), and contributes to poor quality of life and increased healthcare costs (19).  
30 Therefore, there is a growing urgency to address overweight or obesity by offering healthy lifestyle  
31 support in primary health care (20). In particular, multicomponent lifestyle interventions appear to be  
32 promising in effectively reducing overweight and obesity (21–27). Due to the new reimbursement policy  
33 for CLIs, all Dutch citizens with overweight or obesity became formally eligible for refunded  
34 participation in a CLI per January 2019.

35  
36 One important but often overlooked question is whether healthcare innovations can be successfully  
37 implemented and scaled up in practice. This study explored GPs' experiences and views on the  
38 implementation of CLIs in primary care to identify barriers and facilitators to the successful  
39 implementation and scaling of healthcare innovations in primary care. Barriers and facilitators at an  
40 early stage of implementation were identified. This knowledge may contribute to optimising  
41 implementation of CLIs and/or similar healthcare innovations into primary care.  
42  
43  
44  
45  
46  
47  
48  
49  
50  
51  
52  
53

## 54 **Methods**

### 56 **Study design**

57 This qualitative study consisted of semi-structured interviews among a purposive sample of 15 GPs,  
58 guided by a topic list. The technology acceptance model (TAM) (28) was used as inspiration and  
59 framework for relevant topics for the interview guide (table 1) and coding of the transcripts. The TAM  
60



model was chosen as this was originally developed as a framework for the introduction and implementation of innovative interventions (29,30). Several TAM variations have been developed since the introduction of the original TAM, which have been proven useful in different research domains, including implementation research in healthcare (31).

**Table 1.** Interview topic guide

| Topics                   |                                                                              |
|--------------------------|------------------------------------------------------------------------------|
| Introduction researcher  | Introduction interviewer, research group and sign informed consent           |
| Introduction participant | Characteristics of general practitioner                                      |
| Prevention               | Thoughts on role of GP in prevention                                         |
| Lifestyle interventions  | View on lifestyle interventions                                              |
| CLIs                     | Awareness and knowledge of CLIs, view on CLIs                                |
| Experiences              | Experiences with lifestyle interventions, lifestyle coaches and CLIs         |
| Effectiveness            | Belief in effectiveness of CLIs, their added value on current care provision |
| Intention                | Intention of referring to CLI coaches, benefit of reimbursement              |
| Implementation           | Facilitators and barriers for implementation, ideal implementation           |
| Feedback on interview    | Feedback of participant on topics and questions                              |

### Ethics

The medical ethics committee of the Amsterdam UMC (location AMC) granted a waiver for this study (reference number NL68852.018.19). In line with Dutch legislation, this committee ruled that the study did not require extensive ethical review as participants were recruited on a volunteer basis and were not requested to undergo any physical examination or intervention.

### Setting

In the Netherlands, more than eighty percent of GPs share a practice with other GPs (32). Most GPs work closely with practice nurses, who support them with the care for patients with a chronic condition within the general practice, for example diabetes and cardiovascular diseases. Some of the general practices are part of a health centre, which are defined as multidisciplinary primary care practices with additional primary care providers (including practice nurses, physical therapists, dieticians, etc.). In addition, general practices and/or health centres can be part of a care group, which are defined as local or regional GP networks, involved in shared contracts on chronic care delivery with health insurance companies (32).

### Recruitment

Fifteen GPs across a diversity of primary care practices were purposively recruited for semi-structured interviews. Purposive sampling was used to enable balance for the following GP characteristics: gender (M/F), working experience (0-10, >10 years) type of general practice (health care centre: Y/N, part of care group: Y/N). Recruitment of GPs took place through snowballing, covering a large geographical area of the Netherlands to ensure sufficient contrasts. Invitations were sent by email, followed by an information letter after a positive reply. The interviews took place between February and April 2019. Overall, 15 GPs took part in an interview. In line with the Amsterdam UMC code of good conduct in medical research (33), provisions were made to assure the anonymity of the respondents in data collection, analysis and presentation.

### Data collection

All interviews were conducted face to face at the GP practice by WH, a medical student in the final phase of training. The interviews lasted about half an hour on average. The researcher verified whether the participant had read the information letter, before asking for written consent. All interviews were audio recorded with participants' permission. After interim analysis based on half of the interviews, one topic was added to the interview guide, to obtain a deeper understanding what constitutes optimal implementation of CLIs in daily practice. To increase content validity, the GPs were asked for feedback after each interview, about the relevance of the research questions and suggestions for additional questions. The input was used to make further adjustments to wording and sequencing of the topic guide for subsequent interviews. GPs received a small reimbursement (gift voucher) for their participation.

1  
2  
3 Since most of them were relatively unfamiliar with the CLI, two additional GPs who gained clear  
4 experience with the CLI were recruited and interviewed. The research team read all (WH & JL) or a  
5 subset of the coded transcripts (EMvC & EB), discussed them among the team members and established  
6 the level of data saturation, based on the results of new interviews in relation to the previous findings.  
7 Thematic saturation (34) occurred after 15 interviews.  
8

### 9 **Data analysis**

10 The framework method for qualitative research was followed for a systematic approach of data analysis  
11 (35). This comprised the stages of transcription, familiarisation, coding, applying the framework and  
12 interpretation. All but one of the interviews were transcribed verbatim. One audio recording failed due  
13 to a technical error. Instead of being transcribed, WH summarised the conversation immediately after  
14 the interview. Familiarisation with the data took place during transcription and by reading the transcripts  
15 in detail. In parallel, the interview guide was discussed and refined by the research team. Transcripts  
16 were coded using both an inductive and deductive approach with supporting qualitative data analysis  
17 software ATLAS.ti 8 (36). Two separate researchers (WH & JL) coded the transcripts, starting with an  
18 inductive open coding phase, identifying categories and applying a code to a line or paragraph. After  
19 the first three transcripts, these open codes were deductively assigned to the categories of the TAM  
20 model (28). Applied categories were perceived utility, perceived ease of use and intention to use,  
21 including their subcategories, creating a coding scheme. When a code did not fit TAM the model, a new  
22 category was created, capturing the essence of the code. After the full research team agreed on the  
23 identified categories and codes, the final coding scheme emerged, which then was applied on all  
24 transcripts. The Standards for Reporting Qualitative Research (SRQR) were used as guideline for  
25 appropriate reporting (37).  
26

### 27 **Patient and Public Involvement**

28 There was no patient or public involvement in the study.  
29  
30  
31  
32  
33  
34  
35  
36  
37  
38  
39  
40  
41  
42  
43  
44  
45  
46

## 47 **Results**

### 48 **Sample of GPs**

49 The purposive sample of GPs contained a balance in the intended characteristics (Appendix 1). The  
50 experience with referring patients to CLIs (hardly any experience/little experience/experienced)  
51 emerged during data analysis, to be clearly related with GPs' view on lifestyle interventions and potential  
52 barriers and facilitators. Therefore, the research team decided to include this characteristic as an  
53 additional sampling criterion.  
54  
55

### 56 **Perceptions, intentions and behaviour of GPs**

57 The perception, intentions and behaviour of GPs regarding the implementation of CLIs in primary care  
58 could be categorized into three main themes: 1) Relevance and use of lifestyle interventions in general,  
59  
60

2) Relevance and use of CLIs, and 3) Barriers and facilitators to the implementation of CLIs. Each theme will be discussed below, with the corresponding sub-themes, as summarized in Table 2.

**Table 2.** Themes and subthemes in results

| Themes                                                  | Subthemes                                                                                               |
|---------------------------------------------------------|---------------------------------------------------------------------------------------------------------|
| Relevance and use of lifestyle interventions in general | GPs' role in lifestyle modification interventions<br>Perceived effectiveness of lifestyle interventions |
| Relevance and use of combined lifestyle interventions   | Awareness of CLI<br>Perceived effectiveness of CLI<br>Experiences with CLI                              |
| Barriers and facilitators to implementation of CLIs     | Barriers<br>Facilitators                                                                                |

### **Relevance and use of lifestyle interventions in general**

GPs' views on the relevance of lifestyle interventions and their current use in daily practice was influenced by their opinion about the role a GP should play in lifestyle support as well as the perceived effectiveness of lifestyle interventions.

#### ***GPs' role in lifestyle modification interventions***

Prevention through lifestyle interventions was considered important by all GPs, although there was substantial variation on perceived relevance and the role of the GP in lifestyle interventions.

From the interviews, two main approaches of lifestyle support by GPs emerged. The first one focused on referral of eligible patients to qualified professionals for further lifestyle coaching.

*When you want to do something with lifestyle, you often refer to the dietician or physical therapist for example. Nowadays, it's often embedded in a chronic care program, such as the one for diabetes. - GP 7, Male*

The second approach was followed by GPs taking an active role in guidance on healthy lifestyles themselves.

*I actually experiment with lifestyle support myself, for example by doing a one-hour lifestyle consultation, to discuss all kinds of lifestyle-related issues in more detail. I am busy with all kinds of projects, together with social work, physiotherapists, dieticians and lifestyle coach-like people, from which a nice network has emerged. - GP 2, Male*

One of the interviewees believed achieving a healthy lifestyle was a responsibility that primarily lied with patients themselves, without the need to provide large-scale support and coaching.

*I think the best thing is if patients take control themselves. Without the help of other care providers (besides GPs), becoming more independent and stronger and taking it into their own hands. - GP 3, Male*

Next to their own role, GPs felt that the national government plays an important role in prevention, mainly through policies and regulations promoting a healthy lifestyle, e.g. raising taxes on unhealthy food products.

*I think the government has a big role in imposing taxes and other smart things. How products are displayed in the supermarket, the locations of snack bars... instead of leaving it up to the medical care. - GP 13, Male*

GPs' own experiences with providing or referring their patients for lifestyle support appeared to have a positive effect on their judgement of this type of care provision, due to the stimulating effect of ample positive feedback from their patients and the health results that were achieved. .

*You see that people can get rid of their medication, that HbA1c has gone down, that blood pressure is improving, that people are losing weight, that kind of things. That shows me that it is effective. - GP 2, Male*

### ***Perceived effectiveness of lifestyle interventions***

One of the main factors driving the judgement on lifestyle programs was the GP's perceived effectiveness of these interventions with quality of the lifestyle coaches and intensity (duration and number of sessions) playing a big role.

*It obviously depends on the intervention, how many contact moments there are for communication and weighing. Besides that, when such a program ends, are people left to themselves again or do they still have follow-up meetings regularly? Of course, we know from research that behaviour change takes time. If it is a very short intervention without any follow-up, it is not going to be effective. - GP 1, Female*

Patient's motivation also was an important prerequisite for effectiveness of lifestyle interventions. Most GPs considered it their responsibility to motivate participants, but some felt that without a certain motivation level any attempt would be useless.

*Lifestyle interventions can be extremely effective in risk reduction. However, that definitely requires patient's motivation. Unfortunately, many think it will be arranged for them if they start with something like that (CLI). Of course, that's not the case. You get information, you get advice, you get a helping hand, but in the end, you have to do it yourself. - GP 15, Female*

Both, a proactive attitude of GPs in offering lifestyle support and more experience with lifestyle interventions, made GPs more convinced of the potential effectiveness and usefulness of lifestyle interventions in general.

### **Relevance and use of combined lifestyle interventions**

Only few GPs were well aware of the recently introduced CLI-programs and almost no one had experience with referring patients to a CLI. The perceived effectiveness of CLIs varied.

#### ***Awareness of CLI***

Only few GPs appeared to be well informed on the concept of a certified coach and lifestyle groups for weight reduction for obese patients with high cardiovascular risk profile. GPs indicated that more understanding of the proposed multi-component interventions was necessary to facilitate their referral of patients to such programs.

*I need to know more about it (CLI) and have clearer and more specific information about it... I think if I know more about it, someone explains me more clearly what will be reimbursed or not, what the investment is for the patient, what happens if they drop out, then I might be able to do something with it. - GP 10, Male*

The interviews revealed that GPs had a more positive attitude towards the program when they had an unequivocal understanding for which of their patients CLI was intended, as it was not always clear which patients were eligible for participation in CLIs.

*I do have a number of patients in mind who are overweight or obese and if the CLI might be a solution for them, that would be great. - GP 7, Male*

#### ***Perceived effectiveness of CLI***

Some GPs believed CLIs could be effective in the prevention of chronic diseases.

*I think something like that (CLI) is much better than all those pills we prescribe. These are the things that have been proven to be good for you, if you exercise it is good for the prevention of cardiovascular disease, for diabetes, it is good for everything. - GP 9, Female*

However, some were sceptical about the added value of such interventions above and beyond the already well-established support offered by existing qualified paramedical health care professionals, such as physiotherapists, dieticians or practice nurses. GPs without prior experience with CLI felt that the introduction of a lifestyle coach might even complicate referral procedures.

*Do I believe in it (lifestyle coach)? Well, I am not convinced yet. A lifestyle coach is a new profession in healthcare. What is their background, what can they do? I think you can easily call yourself a lifestyle*

1  
2  
3 *coach. When I will co-operate with someone, I need to have a little bit of faith in someone. I want to*  
4 *know that someone can actually do what is asked. - GP4, Female*

5  
6 Finally, GPs often expressed doubts on the long-term effect of CLIs, despite a potential beneficial short-  
7 term effect in behavioural change.

8  
9 *I'm always a little afraid of a temporary effect only. After 2 years, that (CLI) is stopped and then people*  
10 *can easily fall back into old behavioural patterns. That is the problem with groups, as long as they are*  
11 *together, it is going well, but I think it is very difficult to maintain the lifestyle changes afterwards. - GP*  
12 *4, Female*

### 13 **Experiences with CLI**

14 The four GPs who had gained some experience with CLIs and lifestyle coaches worked within care  
15 groups which had contracted this type of care.

16  
17 *We refer people with cardiovascular diseases to lifestyle groups and recently we have also started*  
18 *referring overweight people to the combined lifestyle intervention. - GP 15, Female*

19  
20 All of them were positive on the group sessions being part of the CLIs and were convinced of the added  
21 value of these group sessions on current lifestyle care.

22  
23 *It's nice to hear the experiences of other people, to hear those others struggle with the same problems.*  
24 *Sometimes people get to know each other, pick things up together, have each other's support. So, I think*  
25 *it is certainly not for everyone, but it is very useful for quite a lot of people. - GP 14, Female*

26  
27 Limited awareness of CLIs among GPs and lack of belief in the long-term effect or the added value of  
28 CLIs -on top of established interventions-, may result in barriers for the implementation of CLIs. On the  
29 contrary, GPs who are convinced CLIs may be effective and who have a positive experience, may  
30 contribute successful implementation of CLIs.

### 31 **Barriers and facilitators to implementation of CLIs**

32 The interviews revealed several factors that may affect successful implementation of CLI.

#### 33 **Barriers**

34  
35 Most GPs indicated already providing lifestyle advice on a daily basis and therefore were not always  
36 convinced that CLIs would have an additional value.

37  
38 *In all honesty, I think prevention is always a complicated issue in general practice. We're busy with*  
39 *prevention all day long, giving lifestyle advice throughout the day. That is what I also think with this*  
40 *CLI, it is what we are already doing all the time, isn't it? What more can we offer? - GP 5, Female*

41  
42 The limited budget health insurance companies received from the government was seen as a major  
43 barrier for CLI implementation, yielding insufficient room to cover the eligible high-risk population  
44 within their practice population.

45  
46 *It (CLI) will not get off the ground, because they have deliberately limited the budget. - GP 13, Male*

47  
48 Lack of convincing scientific evidence on the effectiveness of the CLI for the patient was also mentioned  
49 as a barrier to implementation. Therefore, GPs proposed to test CLIs in a trial first, before the  
50 government would take a final decision on large-scale funding of such programs in the health care  
51 landscape. Finally, lack of visibility of CLI-offering organisations in the close vicinity of the practice,  
52 as well as shortage of certified lifestyle coaches were mentioned as barriers to make use of CLIs.

#### 53 **Facilitators**

54 GPs indicated that successful implementation of CLIs would mainly depend on long-term financial and  
55 organisational support.

56  
57 *I hope that when health insurance companies say we will reimburse it, they will do so for at least 5 years*  
58 *or so. That there is the opportunity to build something and have success with it. Because I think, it takes*  
59 *around 2-3 years before such a new measure is picked up a bit. - GP 1, Female*

1  
2  
3 Other prerequisites for a successful program were adequate, centralised coordination of the  
4 implementation, and continuous monitoring and evaluation of the program with key stakeholders,  
5 including GPs.  
6

7 *We have a regional primary care organization for the entire region, so to speak. Almost all general*  
8 *practitioners are affiliated with it. They are responsible for the organisation of chronic care, people*  
9 *with cardiovascular disease, diabetes and COPD for example. This (CLIs) is actually part of it, so the*  
10 *organization will pick it up and inform us (GPs) on it. - GP 12, Female*  
11

12 This preference was emphasised by the GPs who had already worked with CLIs.

13 *You need someone who takes care of the organisation. A GP cooperative is quite an appropriate*  
14 *organisation for that, I think. Someone who examines: do we have lifestyle coaches in the region, how*  
15 *are we going to get more, how are we going to arrange referrals from general practitioners to lifestyle*  
16 *coaches and how do we ensure that they become known to general practitioners? - GP 14, Female*  
17  
18  
19  
20  
21  
22  
23  
24  
25  
26  
27  
28  
29  
30  
31  
32  
33  
34  
35  
36  
37  
38  
39  
40  
41  
42

## 43 **Discussion**

### 44 **Main findings**

45 In this study, we explored GPs' views on the implementation of combined lifestyle interventions (CLIs)  
46 in primary care, from an early moment of the introduction of the reimbursement policy in the  
47 Netherlands. Most GPs acknowledge the relevance and importance of lifestyle support across a broad  
48 spectrum of patients. GPs' views on lifestyle support programmes were influenced by their belief in its  
49 effectiveness and their perceived professional role in preventive care. In addition, this appeared to be  
50 closely related to the way they put personal lifestyle guidance into practice, or to referrals to health care  
51 professionals to deliver such care, including CLI coaches. According to GPs, the implementation of  
52 CLIs fell short on several levels. First, there was limited awareness of CLIs among GPs, and also the  
53 content of the CLIs and its effectiveness was not entirely clear. GPs were not always convinced of the  
54 added value of such programs above and beyond the existing lifestyle support already offered by  
55 paramedical professionals (e.g., physiotherapists, dieticians). Most GPs indicated they provided lifestyle  
56 support on a daily basis themselves. Second, the amount of available budget for CLI reimbursement was  
57 perceived to be insufficient to cover the costs of the entire group of eligible patients. The CLI  
58 reimbursement policy was also perceived as a potential threat to other, already established, health care  
59  
60

1  
2  
3 professions and lifestyle interventions. Third, limited capacity of CLI coaches in the proximity of the  
4 GP practice, as well as a lack of coordination of the implementation of CLI programmes was regarded  
5 as a potential barrier to their adoption. According to the GPs, a well-coordinated introduction of CLIs  
6 for GP practices would facilitate early adoption and implementation. GPs also indicated that continuous  
7 monitoring and evaluation of the CLI programme should be available, to create an evidence base on the  
8 long-term effectiveness. This is needed to justify and facilitate the allocation of sufficient budget for  
9 reimbursement of CLIs for all potentially eligible participants.  
10

### 11 **Related work**

12 Below we discuss how the main findings relate to earlier work in this domain.

13 Previous implementation research has shown that GPs have different perceptions on whether lifestyle  
14 support is part of their core tasks (38–40). This is in line with our findings, showing a broad range of  
15 preferred strategies, from provision of personalised, active lifestyle support to referral of patients to  
16 other health care professionals. A crucial prerequisite for adopting preventive interventions, including  
17 lifestyle guidance, appears GPs' belief in their effectiveness (38,41). Conversely, the perceived lack of  
18 scientific evidence for their (long-term) effectiveness, or belief that health care authorities are better  
19 equipped to provide preventive care withholds GPs to implement interventions in practice (21,38,40,42–  
20 45).  
21

22 Our study demonstrated a lack of awareness among GPs on the CLI and the reimbursement policy.  
23 Sufficient awareness and knowledge among GPs on content and effectiveness of new programs appear  
24 to be important requirements for a positive attitude towards healthcare innovations (38,46–48). The  
25 visibility and sustained provision of behavioural lifestyle interventions is an additional factor that affects  
26 GPs' willingness to utilize them in their daily care (49). This appears to be strengthened by GPs' mention  
27 of their unfamiliarity with the CLI-program's content and lifestyle coaches' new and unknown role as  
28 important barriers to its implementation. There is some evidence that education and early involvement  
29 of key stakeholders (e.g., those needed to implement the innovation) increase the adoption of healthcare  
30 innovations (43,46,50–53). Facilitating increased awareness and knowledge on CLIs among GPs  
31 through actively involving GPs in an early phase could therefore contribute to their overall  
32 implementation.  
33

34 Other factors that may impede implementation of behavioural lifestyle support programs are high  
35 workload, lack of time and lack of finances (38–40,43,46). In our study, burden of work or time  
36 constraints were hardly mentioned, possibly since the intervention mostly lay outside GPs' care  
37 provision. Nevertheless, they did raise concerns about potential limitations in funding and professional  
38 resources, which have been shown important factors for successful adoption (50,54). On the other hand,  
39 it was emphasized that coordination at the GP cooperative level was a clear potential facilitator for early  
40 adoption and implementation of the CLI.  
41  
42

### 43 **Strengths and limitations**

44 The timing of this study was at an opportune moment, as an intervention for primary care became  
45 available in real life, in order to observe to what extent a new policy was being leveraged. This made it  
46 possible to explore and understand facilitators and barriers for adoption in an early stage of  
47 implementation. These first experiences and expectations can inform the guidance of the further  
48 development of its implementation. However, this may also be a limitation, as overall perceptions of the  
49 GPs may have changed over time due to more experience and more public discussion related to the  
50 CLIs. Another limitation of our study is that it focused on GP's perspectives only, while the views of  
51 other stakeholders, including patients, health insurance companies or lifestyle coaches, could have led  
52 to more comprehensive insights on the dynamics of CLI implementation.  
53

### 54 **Conclusion and implications**

55 This study showed that the early adoption and implementation of CLIs in primary care in the Netherlands  
56 is challenging. Although GPs acknowledged the importance of lifestyle support in general, the  
57 awareness of CLIs was still limited. At the same time, doubts about their effectiveness for participants,  
58 their added value on top of already existing lifestyle support interventions and the lack of resources for  
59 GPs to realise the CLI in practice, hindered their adoption. Policy makers, together with the developers  
60 of the CLIs, should pay attention to the adequate promotion of new CLIs and the early involvement of

1  
2  
3 key stakeholders in the regional implementation. In addition, the available financial and professional  
4 resources to realise the CLI in practice for the entire group of potentially eligible people and coordination  
5 at a GP cooperative level must also be considered. Finally, attention should also be paid to the alignment  
6 with existing programs for lifestyle support and preventive services in primary care and the feedback to  
7 the GPs on achieved results by participants. Proper monitoring and evaluation of the implementation of  
8 CLIs and their effectiveness may elucidate opportunities for improvement.  
9

### Acknowledgments

10  
11  
12  
13  
14  
15  
16  
17  
18  
19  
20  
21  
22  
23  
24  
25  
26  
27  
28  
29  
30  
31  
32  
33  
34  
35  
36  
37  
38  
39 The authors gratefully acknowledge all the GPs who shared their experiences and insights in order that  
40 we could understand to what extent a new policy regarding the CLIs in the Netherlands was being  
41 leveraged.  
42  
43  
44

### Author contributions

- 45 • WH designed the study in collaboration with the research team, created the interview guide, led the  
46 qualitative data collection and conducted and transcribed the interviews, then coded all transcripts  
47 and has analysed the data in collaboration with the research team.
- 48 • JL assisted in the study design, recruited participants, finetuned the interview guide, coded  
49 transcripts and contributed to the interpretation of data and editing of the article.
- 50 • EMvC assisted in the study design, recruited participants, coded transcripts and contributed to the  
51 interpretation of data and editing of the article.
- 52 • EB assisted in the study design, recruited participants, coded transcripts and contributed to the  
53 interpretation of data and editing of the article.
- 54 • All authors provided feedback on the manuscript and approval to the publishing of this manuscript.  
55  
56  
57

### Funding statement

58 Funding for this qualitative research has been provided by the Department of Public & Occupational  
59 health of Amsterdam UMC and Philips Research Eindhoven.  
60



### Competing interests

The authors have no competing interests to declare.

### Data availability statement

The data is stored in a secure environment of the Amsterdam UMC. If necessary, data can be requested from E.J.A.J. Beune (Department of Public and Occupational Health, Amsterdam UMC location AMC, Meibergdreef 15, 1105 AZ Amsterdam, [e.j.beune@amc.uva.nl](mailto:e.j.beune@amc.uva.nl)).

## References

1. Barnett J, Vasileiou K, Djemil F, Brooks L, Young T. Understanding innovators' experiences of barriers and facilitators in implementation and diffusion of healthcare service innovations: a qualitative study. *BMC Health Serv Res* [Internet]. 2011;11(1):342. Available from: <https://doi.org/10.1186/1472-6963-11-342>
2. Berwick DM. Disseminating Innovations in Health Care. *JAMA* [Internet]. 2003 Apr 16;289(15):1969–75. Available from: <https://doi.org/10.1001/jama.289.15.1969>
3. Michie S, Johnston M, Abraham C, Lawton R, Parker D, Walker A. Making psychological theory useful for implementing evidence based practice: A consensus approach. *Qual Saf Heal Care*. 2005;14(1):26–33.
4. Fleuren MAH, Paulussen TGWM, Dommelen P, Buuren S Van. Towards a measurement instrument for determinants of innovations. *Int J Qual Heal Care*. 2014;26(5):501–10.
5. Fleuren M, Wiefferink K, Paulussen T. Determinants of innovation within health care organizations. *Int J Qual Heal Care*. 2004;16(2):107–23.
6. Teuscher D, Bukman AJ, Baak MA Van, Feskens EJM, Renes RJ, Meershoek A. A lifestyle intervention study targeting individuals with low socioeconomic status of different ethnic origins : important aspects for successful implementation. 2018;1–10.
7. Fischer F, Lange K, Klose K, Greiner W, Kraemer A. Barriers and Strategies in Guideline Implementation—A Scoping Review. *Healthcare*. 2016;4(3):36.
8. Peters DH, Adam T, Alonge O. Implementation research : what it is and how to do it. 2013;6753(November):1–7. Available from: <http://dx.doi.org/doi:10.1136/bmj.f6753>
9. Rijksinstituut voor Volksgezondheid en Milieu (RIVM). Factsheet gecombineerde leefstijl interventie.
10. Huis voor Beweging. Beschrijving interventie BeweegKuur. RIVM. 2015;
11. Expertisecentrum Leefstijlinterventies. Beschrijving interventie Cool. RIVM. 2015;
12. GGD Noord- en Oost-Gelderland. Beschrijving interventie SLIMMER. RIVM. 2015;

13. Berendsen BAJ, Hendriks MRC, Rutten GM, Kremers SPJ, Savelberg HHCM, Schaper NC. The added value of frequent physical activity group sessions in a combined lifestyle intervention: A cluster randomised trial in primary care. *Prev Med reports*. 2020 Dec;20:101204.
14. Gremeaux V, Drigny J, Nigam A, Juneau M, Guilbeault V, Latour E, et al. Long-term lifestyle intervention with optimized high-intensity interval training improves body composition, cardiometabolic risk, and exercise parameters in patients with abdominal obesity. *Am J Phys Med Rehabil*. 2012 Nov;91(11):941–50.
15. Peiris CL, Taylor NF, Hull S, Anderson A, Belski R, Furlanos S, et al. A Group Lifestyle Intervention Program Is Associated with Reduced Emergency Department Presentations for People with Metabolic Syndrome: A Retrospective Case-Control Study. *Metab Syndr Relat Disord*. 2018;16(2):110–6.
16. Hardcastle S, Taylor A, Bailey M, Castle R. A randomised controlled trial on the effectiveness of a primary health care based counselling intervention on physical activity, diet and CHD risk factors. *Patient Educ Couns*. 2008 Jan;70(1):31–9.
17. Seidell JC, Halberstadt J. The global burden of obesity and the challenges of prevention. *Ann Nutr Metab*. 2015;66(suppl 2):7–12.
18. World Health Organization. 10 Facts on obesity. Vol. October. 2017.
19. World Health Organization. Global Health Expenditure Database. 2016.
20. Lee IM, Shiroma EJ, Lobelo F, Puska P, Blair SN, Katzmarzyk PT, et al. Effect of physical inactivity on major non-communicable diseases worldwide: An analysis of burden of disease and life expectancy. *Lancet*. 2012;380(9838):219–29.
21. Mai K, Brachs M, Leupelt V, Jumpertz-von Schwartzberg R, Maurer L, Grüters-Kieslich A, et al. Effects of a combined dietary, exercise and behavioral intervention and sympathetic system on body weight maintenance after intended weight loss: Results of a randomized controlled trial. *Metabolism*. 2018;83:60–7.
22. König D, Hörmann J, Predel H-G, Berg A. A 12-Month Lifestyle Intervention Program Improves Body Composition and Reduces the Prevalence of Prediabetes in Obese Patients. *Obes Facts*. 2018;11(5):393–9.
23. Hassan Y, Head V, Jacob D, Bachmann MO, Diu S, Ford J. Lifestyle interventions for weight loss in adults with severe obesity: a systematic review. *Clin Obes*. 2016;6(6):395–403.
24. Duijzer G, Haveman-Nies A, Jansen SC, Ter Beek J, Van Bruggen R, Willink MGJ, et al. Effect and maintenance of the SLIMMER diabetes prevention lifestyle intervention in Dutch primary healthcare: A randomised controlled trial. *Nutr Diabetes*. 2017;7(5).
25. Roumen C, Blaak EE, Corpeleijn E. Lifestyle intervention for prevention of diabetes: Determinants of success for future implementation. *Nutr Rev*. 2009;67(3):132–46.
26. Schutte BAM, Haveman-Nies A, Preller L. One-year results of the Beweeg-Kuur lifestyle intervention implemented in Dutch primary healthcare settings. *Biomed Res Int*. 2015;
27. Zhang Y, Pan XF, Chen J, Xia L, Cao A, Zhang Y, et al. Combined lifestyle factors and risk of incident type 2 diabetes and prognosis among individuals with type 2 diabetes: a systematic review and meta-analysis of prospective cohort studies. *Diabetologia*. 2020;63(1):21–33.
28. Venkatesh V, Davis FD. A Theoretical Extension of the Technology Acceptance Model: Four Longitudinal Field Studies. *Manage Sci*. 2003;46(2):186–204.
29. Davis FD. Perceived Usefulness, Perceived Ease of Use, and User Acceptance of Information Technology. *MIS Q*. 1989;13(0):319–40.
30. Davis FD, Bagozzi RP, Warshaw PR. User Acceptance of Computer Technology: A Comparison of Two Theoretical Models. *Manage Sci*. 2008;35(8):982–1003.
31. Holden RJ, Karsh B-T. The technology acceptance model: its past and its future in health care. *J Biomed Inform*. 2010;43(1):159–72.
32. Tikkanen R et al. International Health Care System Profiles - Netherlands. Vol. 6, *Journal of the American Board of Family Medicine*. 2020.
33. Independence in Scientific Research: Research Code AMC–VUmc. 2019.
34. Saunders B, Sim J, Kingstone T, Baker S, Waterfield J, Bartlam B, et al. Saturation in qualitative research: exploring its conceptualization and operationalization. *Qual Quant*. 2018;52(4):1893–907.
35. Gale NK, Heath G, Cameron E, Rashid S, Redwood S. Using the framework method for the analysis of qualitative data in multi-disciplinary health research. *BMC Med Res Methodol*. 2013;13:117.
36. ATLAS.ti 8. p. <https://atlasti.com/>.
37. O'Brien BC, Harris IB, Beckman TJ, Reed DA, Cook DA. Standards for Reporting Qualitative Research: A Synthesis of Recommendations. *Acad Med [Internet]*. 2014;89(9). Available from: [https://journals.lww.com/academicmedicine/Fulltext/2014/09000/Standards\\_for\\_Reporting\\_Qualitative\\_Research\\_\\_A.21.aspx](https://journals.lww.com/academicmedicine/Fulltext/2014/09000/Standards_for_Reporting_Qualitative_Research__A.21.aspx)
38. Geense WW, Glind IM Van De, Visscher TLS, Achterberg T Van. Barriers, facilitators and attitudes

- 1  
2  
3 influencing health promotion activities in. *BMC Fam Pract.* 2013;14(20).
- 4 39. Ampt AJ, Amoroso C, Harris MF, McKenzie SH, Rose VK, Taggart JR. Attitudes, norms and controls  
5 influencing lifestyle risk factor management in general practice. *BMC Fam Pract.* 2009;10:1–8.
- 6 40. Rubio-Valera M, Pons-Vigués M, Martínez-Andrés M, Moreno-Peral P, Berenguera A, Fernández A.  
7 Barriers and facilitators for the implementation of primary prevention and health promotion activities in  
8 primary care: A synthesis through meta-ethnography. *PLoS One.* 2014;9(2).
- 9 41. Jansink R, Braspenning J, van der Weijden T, Elwyn G, Grol R. Primary care nurses struggle with  
10 lifestyle counseling in diabetes care: a qualitative analysis. *BMC Fam Pract.* 2010 May;11:41.
- 11 42. Sebo P, Maisonneuve H, Fournier J-P, Senn N, Haller DM. General practitioners' views and preferences  
12 about quality improvement feedback in preventive care: a cross-sectional study in Switzerland and  
13 France. *Implement Sci.* 2017;12(1):95.
- 14 43. Brotonsc C, Björkelund C, Bulc M, Ciurana R, Godycki-Cwirko M, Jurgova E, et al. Prevention and  
15 health promotion in clinical practice: The views of general practitioners in Europe. *Prev Med (Baltim).*  
16 2005;40(5):595–601.
- 17 44. Verberne LDM, Hendriks MRC, Rutten GM, Spronk I, Savelberg HHCM, Veenhof C, et al. Evaluation  
18 of a combined lifestyle intervention for overweight and obese patients in primary health care: A quasi-  
19 experimental design. *Fam Pract.* 2016;33(6):671–7.
- 20 45. Haw JS, Galaviz KI, Straus AN, Kowalski AJ, Magee MJ, Weber MB, et al. Long-term sustainability of  
21 diabetes prevention approaches: A systematic review and meta-analysis of randomized clinical trials.  
22 *JAMA Intern Med.* 2017;177(12):1808–17.
- 23 46. Molema CCM, Schegget S, Schuit AJ, Goor LAM Van De. Perceived barriers and facilitators of the  
24 implementation of a combined lifestyle intervention with a financial incentive for chronically ill patients.  
25 2019;1–11.
- 26 47. Alayli A, Krebs F, Lorenz L, Nawabi F, Bau A, Lück I, et al. Evaluation of a computer-assisted multi-  
27 professional intervention to address lifestyle-related risk factors for overweight and obesity in expecting  
28 mothers and their infants : protocol for an effectiveness- implementation hybrid study. 2020;1–13.
- 29 48. Helmink JHM, Kremers SPJ, Van Boekel LC, Van Brussel-Visser FN, De Vries NK. Factors  
30 determining the motivation of primary health care professionals to implement and continue the  
31 “Bewegkuur” lifestyle intervention programme. *J Eval Clin Pract.* 2012;18(3):682–8.
- 32 49. Cohen Rodrigues TR, de Buissonjé DR, Keesman M, Reijnders T, van der Geer JE, Janssen VR, et al.  
33 Facilitators of and Barriers to Lifestyle Support and eHealth Solutions: Interview Study Among Health  
34 Care Professionals Working in Cardiac Care. *J Med Internet Res.* 2021;23(10):e25646.
- 35 50. Grol R, Grimshaw J. From best evidence to best practice : effective implementation of change in patients  
36 ' care. *Res into Pract.* 2003;362:1225–30.
- 37 51. Beune EJAJ, Haafkens JA, Bindels PJE. Barriers and enablers in the implementation of a provider-based  
38 intervention to stimulate culturally appropriate hypertension education. *Patient Educ Couns.*  
39 2011;82(1):74–80.
- 40 52. Kingma AEC, van Stel HF, Oudega R, Moons KGM, Geersing GJ. Multi-faceted implementation  
41 strategy to increase use of a clinical guideline for the diagnosis of deep venous thrombosis in primary  
42 care. *Fam Pract.* 2017;34(4):446–51.
- 43 53. Van Rinsum C, Gerards S, Rutten G, Johannesma M, Van De Goor I, Kremers S. The implementation of  
44 the coaching on lifestyle (CooL) intervention: Lessons learnt. *BMC Health Serv Res.* 2019;19(1):1–12.
- 45 54. Laws RA, Kemp LA, Harris MF, Davies GP, Williams AM, Eames-Brown R. An exploration of how  
46 clinician attitudes and beliefs influence the implementation of lifestyle risk factor management in  
47 primary healthcare: A grounded theory study. *Implement Sci.* 2009;4(1):1–15.
- 48  
49  
50  
51  
52  
53  
54  
55  
56  
57  
58  
59  
60

1  
2  
3  
4  
5  
6  
7  
8  
9  
10  
11  
12  
13  
14  
15  
16  
17  
18  
19  
20  
21  
22  
23  
24  
25  
26  
27  
28  
29  
30  
31  
32  
33  
34  
35  
36  
37  
38  
39  
40  
41  
42  
43  
44  
45  
46  
47  
48  
49  
50  
51  
52  
53  
54  
55  
56  
57  
58  
59  
60

For peer review only

## Appendix 1

### GP characteristics

| Characteristics                               | N  | %   |
|-----------------------------------------------|----|-----|
| Gender                                        |    |     |
| Male                                          | 6  | 40% |
| Female                                        | 9  | 60% |
| Age                                           |    |     |
| 30-40                                         | 6  | 40% |
| 40-50                                         | 5  | 33% |
| 50-65                                         | 4  | 27% |
| Years of working experience                   |    |     |
| 0-10                                          | 8  | 53% |
| >10                                           | 7  | 47% |
| General practice in health centre             |    |     |
| Yes                                           | 7  | 47% |
| No                                            | 8  | 53% |
| Practice part of a care group                 |    |     |
| Yes                                           | 7  | 47% |
| No                                            | 8  | 53% |
| Socioeconomic status of practice's population |    |     |
| Low                                           | 6  | 40% |
| Middle                                        | 6  | 40% |
| High                                          | 3  | 20% |
| Experience with CLIs                          |    |     |
| No experience                                 | 11 | 73% |
| Little experience                             | 2  | 13% |
| Experienced                                   | 2  | 13% |

## Standards for Reporting Qualitative Research (SRQR)

O'Brien B.C., Harris, I.B., Beckman, T.J., Reed, D.A., & Cook, D.A. (2014). Standards for reporting qualitative research: a synthesis of recommendations. *Academic Medicine*, 89(9), 1245-1251.

| No.                       | Topic                                       | Item                                                                                                                                                                                                                                                                                                                                     | Page |
|---------------------------|---------------------------------------------|------------------------------------------------------------------------------------------------------------------------------------------------------------------------------------------------------------------------------------------------------------------------------------------------------------------------------------------|------|
| <b>Title and abstract</b> |                                             |                                                                                                                                                                                                                                                                                                                                          |      |
| S1                        | Title                                       | Concise description of the nature and topic of the study identifying the study as qualitative or indicating the approach (e.g., ethnography, grounded theory) or data collection methods (e.g., interview, focus group) is recommended                                                                                                   | 1    |
| S2                        | Abstract                                    | Summary of key elements of the study using the abstract format of the intended publication; typically includes objective, methods, results, and conclusions                                                                                                                                                                              | 2    |
| <b>Introduction</b>       |                                             |                                                                                                                                                                                                                                                                                                                                          |      |
| S3                        | Problem formulation                         | Description and significance of the problem/phenomenon studied; review of relevant theory and empirical work; problem statement                                                                                                                                                                                                          | 3    |
| S4                        | Purpose or research question                | Purpose of the study and specific objectives or questions                                                                                                                                                                                                                                                                                | 3    |
| <b>Methods</b>            |                                             |                                                                                                                                                                                                                                                                                                                                          |      |
| S5                        | Qualitative approach and research paradigm  | Qualitative approach (e.g., ethnography, grounded theory, case study, phenomenology, narrative research) and guiding theory if appropriate; identifying the research paradigm (e.g., positivist, constructivist/interpretivist) is also recommended                                                                                      | 4    |
| S6                        | Researcher characteristics and reflexivity  | Researchers' characteristics that may influence the research, including personal attributes, qualifications/experience, relationship with participants, assumptions, or presuppositions; potential or actual interaction between researchers' characteristics and the research questions, approach, methods, results, or transferability | 4    |
| S7                        | Context                                     | Setting/site and salient contextual factors; rationale <sup>a</sup>                                                                                                                                                                                                                                                                      | 4    |
| S8                        | Sampling strategy                           | How and why research participants, documents, or events were selected; criteria for deciding when no further sampling was necessary (e.g., sampling saturation); rationale <sup>a</sup>                                                                                                                                                  | 4    |
| S9                        | Ethical issues pertaining to human subjects | Documentation of approval by an appropriate ethics review board and participant consent, or explanation for lack thereof; other confidentiality and data security issues                                                                                                                                                                 | 4    |
| S10                       | Data collection methods                     | Types of data collected; details of data collection procedures including (as appropriate) start and stop                                                                                                                                                                                                                                 | 4-5  |

|                                                                                                  |                                                                                                                                                                                                                                                                                                       |       |
|--------------------------------------------------------------------------------------------------|-------------------------------------------------------------------------------------------------------------------------------------------------------------------------------------------------------------------------------------------------------------------------------------------------------|-------|
|                                                                                                  | dates of data collection and analysis, iterative process, triangulation of sources/methods, and modification of procedures in response to evolving study findings; rationale <sup>a</sup>                                                                                                             |       |
| S11 Data collection instruments and technologies                                                 | Description of instruments (e.g., interview guides, questionnaires) and devices (e.g., audio recorders) used for data collection; if/how the instrument(s) changed over the course of the study                                                                                                       | 4-5   |
| S12 Units of study                                                                               | Number and relevant characteristics of participants, documents, or events included in the study; level of participation (could be reported in results)                                                                                                                                                | 4     |
| S13 Data processing                                                                              | Methods for processing data prior to and during analysis, including transcription, data entry, data management and security, verification of data integrity, data coding, and anonymization/deidentification of excerpts                                                                              | 5     |
| S14 Data analysis                                                                                | Process by which inferences, themes, etc., were identified and developed, including researchers involved in data analysis; usually references a specific paradigm or approach; rationale <sup>a</sup>                                                                                                 | 5     |
| S15 Techniques to enhance trustworthiness                                                        | Techniques to enhance trustworthiness and credibility of data analysis (e.g., member checking, audit trail, triangulation); rationale <sup>a</sup>                                                                                                                                                    | 4-5   |
| <b>Results/Findings</b>                                                                          |                                                                                                                                                                                                                                                                                                       |       |
| S16 Synthesis and interpretation                                                                 | Main findings (e.g., interpretations, inferences, and themes); might include development of a theory or model, or integration with prior research or theory                                                                                                                                           | 10    |
| S17 Links to empirical data                                                                      | Evidence (e.g., quotes, field notes, text excerpts, photographs) to substantiate analytic findings                                                                                                                                                                                                    | 8-9   |
| <b>Discussion</b>                                                                                |                                                                                                                                                                                                                                                                                                       |       |
| S18 Integration with prior work, implications, transferability, and contribution(s) to the field | Short summary of main findings; explanation of how findings and conclusions connect to, support, elaborate on, or challenge conclusions of earlier scholarship; discussion of scope of application/generalizability; identification of unique contribution(s) to scholarship in a discipline or field | 10    |
| S19 Limitations                                                                                  | Trustworthiness and limitations of findings                                                                                                                                                                                                                                                           | 10-11 |
| <b>Other</b>                                                                                     |                                                                                                                                                                                                                                                                                                       |       |
| S20 Conflicts of interest                                                                        | Potential sources of influence or perceived influence on study conduct and conclusions; how these were managed                                                                                                                                                                                        | 12    |
| S21 Funding                                                                                      | Sources of funding and other support; role of funders in data collection, interpretation, and reporting                                                                                                                                                                                               | 12    |

<sup>a</sup>The rationale should briefly discuss the justification for choosing that theory, approach, method, or technique rather than other options available, the assumptions and limitations implicit in those choices, and how those choices influence study conclusions and transferability. As appropriate, the rationale for several items might be discussed together.
