# Supplementary material for: GPs’ views on the implementation of combined lifestyle interventions in primary care in the Netherlands: a qualitative study
Source: PubMed Central journal article supplement — BMJ Open. 2022 Feb 4;12(2):e056451. doi: 10.1136/bmjopen-2021-056451 (PMC8819797; doi:10.1136/bmjopen-2021-056451), 2022-02-04
Supplement: bmjopen-2021-056451supp001.pdf [file bmjopen-2021-056451supp001.pdf]

## Appendix 1

### GP characteristics

| Characteristics                               | N  | %   |
|-----------------------------------------------|----|-----|
| Gender                                        |    |     |
| Male                                          | 6  | 40% |
| Female                                        | 9  | 60% |
| Age                                           |    |     |
| 30-40                                         | 6  | 40% |
| 40-50                                         | 5  | 33% |
| 50-65                                         | 4  | 27% |
| Years of working experience                   |    |     |
| 0-10                                          | 8  | 53% |
| >10                                           | 7  | 47% |
| General practice in health centre             |    |     |
| Yes                                           | 7  | 47% |
| No                                            | 8  | 53% |
| Practice part of a care group                 |    |     |
| Yes                                           | 7  | 47% |
| No                                            | 8  | 53% |
| Socioeconomic status of practice's population |    |     |
| Low                                           | 6  | 40% |
| Middle                                        | 6  | 40% |
| High                                          | 3  | 20% |
| Experience with CLIs                          |    |     |
| No experience                                 | 11 | 73% |
| Little experience                             | 2  | 13% |
| Experienced                                   | 2  | 13% |
